# Supplementary material
Source: PubMed Central journal article supplement (PMC3408744)
Supplement: JCI63051sd.pdf [file JCI63051sd.pdf]

## SUPPLEMENTAL TABLES

**Supplemental Table 1:** List of proteins identified by mass spectrometry.

| #  | Symbol  | Characteristics of proteins                       | Accession number | Molecular weight (kDa) | Unique peptides |
|----|---------|---------------------------------------------------|------------------|------------------------|-----------------|
| 1  | DHX9    | ATP-dependent RNA helicase A                      | Q08211           | 141                    | 41              |
| 2  | MYBBP1A | Myb-binding protein 1A                            | Q9BQG0           | 149                    | 32              |
| 3  | ADAR    | Adenosine deaminase, RNA-specific                 | Q59EC0           | 138                    | 31              |
| 4  | LMNA    | Prelamin-A/C                                      | P02545           | 74                     | 31              |
| 5  | SMC1A   | Structural maintenance of chromosomes protein 1A  | Q14683           | 143                    | 30              |
| 6  | DDX21   | Nucleolar RNA helicase 2                          | Q9NR30           | 87                     | 27              |
| 7  | HNRNPU  | Heterogeneous nuclear ribonucleoprotein U         | Q00839           | 91                     | 25              |
| 8  | ILF3    | Interleukin enhancer-binding factor 3             | Q12906           | 95                     | 23              |
| 9  | SF3B1   | Splicing factor 3B subunit 1                      | O75533           | 146                    | 23              |
| 10 | HNRNPM  | Heterogeneous nuclear ribonucleoprotein M         | P52272           | 78                     | 22              |
| 11 | VIM     | Vimentin                                          | P08670           | 54                     | 22              |
| 12 | DDX24   | ATP-dependent RNA helicase DDX24                  | Q9GZR7           | 96                     | 22              |
| 13 | NCL     | Nucleolin                                         | P19338           | 77                     | 20              |
| 14 | KHSRP   | Far upstream element-binding protein 2            | Q92945           | 73                     | 20              |
| 15 | TOP2B   | DNA topoisomerase 2-beta                          | Q02880           | 183                    | 20              |
| 16 | NONO    | Non-POU domain-containing octamer-binding protein | Q15233           | 54                     | 19              |
| 17 | SF3B2   | Splicing factor 3B subunit 2                      | Q13435           | 100                    | 18              |
| 18 | PRKDC   | DNA-dependent protein kinase catalytic subunit    | P78527           | 469                    | 17              |
| 19 | DDX17   | DEAD box polypeptide 17 isoform p82 variant       | Q59F66           | 81                     | 16              |
| 20 | HNRNPR  | Heterogeneous nuclear ribonucleoprotein R         | O43390           | 71                     | 16              |
| 21 | PARP1   | Poly [ADP-ribose] polymerase 1                    | P09874           | 113                    | 16              |
| 22 | HNRNPK  | Heterogeneous nuclear ribonucleoprotein K         | P61978           | 51                     | 16              |
| 23 | SFPQ    | Splicing factor, proline- and glutamine-rich      | P23246           | 76                     | 15              |
| 24 | SMARCA5 | SWI/SNF-related matrix-associated actin-          | O60264           | 122                    | 15              |

|    |          |                                                       |        |     |    |
|----|----------|-------------------------------------------------------|--------|-----|----|
|    |          | dependent regulator of chromatin subfamily A member 5 |        |     |    |
| 25 | GNL3     | Guanine nucleotide-binding protein-like 3             | Q9BVP2 | 62  | 15 |
| 26 | HP1BP3   | Heterochromatin protein 1-binding protein 3           | Q5SSJ5 | 61  | 14 |
| 27 | HNRNPL   | Heterogeneous nuclear ribonucleoprotein L             | P14866 | 64  | 13 |
| 28 | IFI16    | Gamma-interferon-inducible protein Ii-16              | B4DJT8 | 83  | 13 |
| 29 | PES1     | Pescadillo homolog                                    | O00541 | 68  | 13 |
| 30 | XRCC6    | X-ray repair cross-complementing protein 6            | P12956 | 70  | 13 |
| 31 | SYNCRIP  | Heterogeneous nuclear ribonucleoprotein Q             | O60506 | 70  | 12 |
| 32 | ZFR      | Zinc finger RNA-binding protein                       | Q96KR1 | 117 | 12 |
| 33 | NUMA1    | Nuclear mitotic apparatus protein 1                   | Q14980 | 238 | 12 |
| 34 | HNRNPC   | Heterogeneous nuclear ribonucleoproteins C1/C2        | P07910 | 34  | 12 |
| 35 | RRP12    | RRP12-like protein                                    | Q5JTH9 | 144 | 12 |
| 36 | DDX5     | Probable ATP-dependent RNA helicase DDX5              | P17844 | 69  | 12 |
| 37 | PRPF6    | Pre-mRNA-processing factor 6                          | O94906 | 107 | 12 |
| 38 | RAD50    | DNA repair protein RAD50                              | Q92878 | 154 | 12 |
| 39 | STRBP    | Spermatid perinuclear RNA-binding protein             | Q96SI9 | 74  | 11 |
| 40 | ILF2     | Interleukin enhancer-binding factor 2                 | Q12905 | 43  | 11 |
| 41 | PBRM1    | Protein polybromo-1                                   | Q86U86 | 193 | 11 |
| 42 | DDX18    | ATP-dependent RNA helicase DDX18                      | Q9NVP1 | 75  | 11 |
| 43 | HSP90AB1 | Heat shock protein HSP 90-beta                        | P08238 | 83  | 11 |
| 44 | PDS5A    | Sister chromatid cohesion protein PDS5 homolog A      | Q29RF7 | 151 | 11 |
| 45 | BAZ1B    | Tyrosine-protein kinase BAZ1B                         | Q9UIG0 | 171 | 10 |
| 46 | TMPO     | Lamina-associated polypeptide 2, isoform alpha        | P42166 | 75  | 10 |
| 47 | NOP56    | Nucleolar protein 56                                  | O00567 | 66  | 10 |
| 48 | LMNB1    | Lamin-B1                                              | P20700 | 66  | 10 |
| 49 | SF3B3    | Splicing factor 3B subunit 3                          | Q15393 | 136 | 10 |
| 50 | EZR      | Ezrin                                                 | P15311 | 69  | 10 |
| 51 | HNRNPH1  | Heterogeneous nuclear                                 | P31943 | 49  | 10 |

|    |          |                                                                                        |        |     |    |
|----|----------|----------------------------------------------------------------------------------------|--------|-----|----|
| 52 | XRCC5    | ribonucleoprotein H<br>X-ray repair cross-<br>complementing protein 5                  | P13010 | 83  | 10 |
| 53 | CDC5L    | Cell division cycle 5-like<br>protein                                                  | Q99459 | 92  | 10 |
| 54 | PTBP1    | Polypyrimidine tract-<br>binding protein 1                                             | P26599 | 57  | 9  |
| 55 | HNRNPA3  | Heterogeneous nuclear<br>ribonucleoprotein A3                                          | P51991 | 40  | 9  |
| 56 | RPN1     | Dolichyl-<br>diphosphooligosaccharide<br>--protein<br>glycosyltransferase<br>subunit 1 | P04843 | 69  | 9  |
| 57 | MECP2    | Methyl-CpG-binding<br>protein 2                                                        | P51608 | 52  | 9  |
| 58 | PDCD11   | Protein RRP5 homolog                                                                   | Q14690 | 209 | 9  |
| 59 | DHX37    | Probable ATP-dependent<br>RNA helicase DHX37                                           | Q8IY37 | 130 | 9  |
| 60 | PRPF19   | Pre-mRNA-processing<br>factor 19                                                       | Q9UMS4 | 55  | 9  |
| 61 | HSPD1    | 60 kDa heat shock<br>protein, mitochondrial                                            | P10809 | 61  | 9  |
| 62 | TOP1     | DNA topoisomerase 1                                                                    | P11387 | 91  | 9  |
| 63 | DDX1     | ATP-dependent RNA<br>helicase DDX1                                                     | Q92499 | 82  | 9  |
| 64 | RUVBL2   | RuvB-like 2                                                                            | Q9Y230 | 51  | 9  |
| 65 | UTP3     | Something about silencing<br>protein 10                                                | Q9NQZ2 | 55  | 8  |
| 66 | HNRNPD   | Heterogeneous nuclear<br>ribonucleoprotein D0                                          | Q14103 | 38  | 8  |
| 67 | RBM10    | RNA-binding protein 10                                                                 | P98175 | 104 | 8  |
| 68 | CSTF3    | Cleavage stimulation<br>factor subunit 3                                               | Q12996 | 83  | 8  |
| 69 | POP1     | Ribonucleases P/MRP<br>protein subunit POP1                                            | Q99575 | 115 | 8  |
| 70 | GPATCH4  | G patch domain-<br>containing protein 4                                                | Q5T3I0 | 50  | 7  |
| 71 | TOR1AIP1 | Torsin-1A-interacting<br>protein 1                                                     | Q5JTV8 | 66  | 7  |
| 72 | SMARCA4  | Transcription activator<br>BRG1                                                        | P51532 | 185 | 7  |
| 73 | ATP5B    | ATP synthase subunit<br>beta, mitochondrial                                            | P06576 | 57  | 7  |
| 74 | PSPC1    | Paraspeckle component 1                                                                | Q8WXF1 | 59  | 7  |
| 75 | HNRNPA1  | Heterogeneous nuclear<br>ribonucleoprotein A1                                          | P09651 | 39  | 7  |
| 76 | RBMX     | Heterogeneous nuclear<br>ribonucleoprotein G                                           | P38159 | 42  | 7  |
| 77 | SART3    | Squamous cell carcinoma<br>antigen recognized by T-                                    | Q15020 | 110 | 7  |

|     |          |                                                                                               |        |     |   |
|-----|----------|-----------------------------------------------------------------------------------------------|--------|-----|---|
|     |          | cells 3                                                                                       |        |     |   |
| 78  | PKP2     | Plakophilin 2                                                                                 | A0AV37 | 93  | 7 |
| 79  | POLR1A   | DNA-directed RNA polymerase I subunit RPA1                                                    | O95602 | 195 | 7 |
| 80  | ACTB     | Actin, cytoplasmic 1                                                                          | P60709 | 42  | 7 |
| 81  | TBL3     | Transducin beta-like protein 3                                                                | Q12788 | 89  | 7 |
| 82  | HNRNPUL2 | Heterogeneous nuclear ribonucleoprotein U-like protein 2                                      | Q1KMD3 | 85  | 7 |
| 83  | DDX54    | ATP-dependent RNA helicase DDX54                                                              | Q8TDD1 | 99  | 7 |
| 84  | NOL10    | Nucleolar protein 10                                                                          | Q9BSC4 | 80  | 7 |
| 85  | SDAD1    | Protein SDA1 homolog                                                                          | Q9NVU7 | 80  | 7 |
| 86  | CHERP    | Calcium homeostasis endoplasmic reticulum protein                                             | Q8IWX8 | 104 | 6 |
| 87  | EWSR1    | RNA-binding protein EWS                                                                       | Q01844 | 68  | 6 |
| 88  | FUS      | RNA-binding protein FUS                                                                       | P35637 | 53  | 6 |
| 89  | KIAA1967 | Protein KIAA1967                                                                              | Q8N163 | 103 | 6 |
| 90  | ARHGAP4  | Rho GTPase-activating protein 4                                                               | P98171 | 105 | 6 |
| 91  | HADHA    | Trifunctional enzyme subunit alpha, mitochondrial                                             | P40939 | 83  | 6 |
| 92  | RRP1     | Ribosomal RNA processing protein 1 homolog A                                                  | P56182 | 53  | 6 |
| 93  | DDX31    | Probable ATP-dependent RNA helicase DDX31                                                     | Q9H8H2 | 94  | 6 |
| 94  | NOP58    | Nucleolar protein 58                                                                          | Q9Y2X3 | 60  | 6 |
| 95  | HNRPAB   | Homo sapiens heterogeneous nuclear ribonucleoprotein A/B (HNRPAB), transcript variant 1, mRNA | B4DMY3 | 35  | 6 |
| 96  | PSIP1    | PC4 and SFRS1-interacting protein                                                             | O75475 | 60  | 6 |
| 97  | DDX50    | ATP-dependent RNA helicase DDX50                                                              | Q9BQ39 | 83  | 6 |
| 98  | CDKN2AIP | CDKN2A-interacting protein                                                                    | Q9NXV6 | 61  | 6 |
| 99  | NOLC1    | Nucleolar and coiled-body phosphoprotein 1                                                    | Q14978 | 74  | 5 |
| 100 | PCF11    | Pre-mRNA cleavage complex 2 protein Pcf11                                                     | O94913 | 173 | 5 |
| 101 | RANGAP1  | Ran GTPase-activating protein 1                                                               | P46060 | 64  | 5 |
| 102 | RBM25    | RNA-binding protein 25                                                                        | P49756 | 100 | 5 |
| 103 | SF3A1    | Splicing factor 3A subunit                                                                    | Q15459 | 89  | 5 |

|     |           |                                                    |        |     |   |
|-----|-----------|----------------------------------------------------|--------|-----|---|
|     |           | 1                                                  |        |     |   |
| 104 | SUN2      | SUN domain-containing protein 2                    | Q9UH99 | 80  | 5 |
| 105 | GTF3C4    | General transcription factor 3C polypeptide 4      | Q9UKN8 | 92  | 5 |
| 106 | PLRG1     | Pleiotropic regulator 1                            | O43660 | 57  | 5 |
| 107 | NUP93     | Nuclear pore complex protein Nup93                 | Q8N1F7 | 93  | 5 |
| 108 | RAVER1    | Ribonucleoprotein PTB-binding 1                    | Q8IY67 | 64  | 5 |
| 109 | MPHOSPH10 | U3 small nucleolar ribonucleoprotein protein MPP10 | O00566 | 79  | 5 |
| 110 | RBBP4     | Histone-binding protein RBBP4                      | Q09028 | 48  | 5 |
| 111 | CD3EAP    | DNA-directed RNA polymerase I subunit RPA34        | O15446 | 55  | 5 |
| 112 | USP39     | U4/U6.U5 tri-snRNP-associated protein 2            | Q53GS9 | 65  | 5 |
| 113 | HDLBP     | Vigilin                                            | Q00341 | 141 | 5 |
| 114 | HSD17B4   | Peroxisomal multifunctional enzyme type 2          | P51659 | 80  | 5 |
| 115 | TARDBP    | TAR DNA-binding protein 43                         | Q13148 | 45  | 5 |
| 116 | RBM14     | RNA-binding protein 14                             | Q96PK6 | 69  | 5 |
| 117 | AATF      | Protein AATF                                       | Q9NY61 | 63  | 5 |

---

**Supplemental Table 2:** Network function analysis of proteins binding to ACA11.

| ID | Molecules in Network                                                                                                                                                                                                | Score | Focus Molecules | Top Functions                                                                                         |
|----|---------------------------------------------------------------------------------------------------------------------------------------------------------------------------------------------------------------------|-------|-----------------|-------------------------------------------------------------------------------------------------------|
| 1  | ADAR, BAZ1B, DDX5, DDX17, DDX21, DHX9, HNRNPC, HNRNPD, HNRNPH1, HNRNPK, HNRNPL, HNRNPM, HNRNPR, HNRNPU, IFI16, ILF3, ILF2, KHSRP, Lamin b, LMNA, LMNB1, NCL, NONO, PARP1, PDS5A, PRKDC, PTBP1, SFPQ, SYNCRIP, TOP2B | 77    | 30              | RNA Post-Transcriptional Modification, Gene Expression, Infection Mechanism                           |
| 2  | DDX18, DDX24, GNL3, HSP90AB1, NUMA1, RAD50, SF3B1, SF3B2, SF3B3, SMARCA5, SMC1A, STRBP, UTP3                                                                                                                        | 27    | 13              | Embryonic Development, Cellular Assembly and Organization, DNA Replication, Recombination, and Repair |
| 3  | EZR, HNRNPA3, MYBBP1A, NOP56, PBRM1, PES1, PRPF6, RRP12, TMPO, VIM, ZFR                                                                                                                                             | 22    | 11              | Neurological Disease, Lipid Metabolism, Small Molecule Biochemistry                                   |

The table contains columns with the network number, the names of the proteins involved in the network, the score value and the top functions. The top functions with score > 20 were listed.

**Supplemental Table 3:** ILF3 immunoprecipitation deep sequencing peaks from H929 myeloma cells.

| Chr   | Start     | Stop      | Gene ID       | Tags   |
|-------|-----------|-----------|---------------|--------|
| chr17 | 33477970  | 33478302  | UNC45B        | 331879 |
| chr1  | 564294    | 570463    | Pseudogenes   | 215840 |
| chr17 | 27050446  | 27051850  | RPL23A        | 170847 |
| chr4  | 1976359   | 1977583   | SCARNA22      | 149143 |
| chr19 | 51305209  | 51305945  | SNORD88C      | 50576  |
| chr5  | 180669835 | 180670898 | SNORD95       | 45082  |
| chr9  | 35657573  | 35658028  | RMRP          | 39351  |
| chr12 | 49047633  | 49048307  | SNORA34       | 36299  |
| chr6  | 86386577  | 86388452  | SNORD50A/B    | 30509  |
| chr19 | 17972750  | 17974267  | RPL18A        | 30256  |
| chr15 | 65588030  | 65589356  | RNU5A         | 28263  |
| chr13 | 92002357  | 92004259  | lincRNA/miRNA | 26741  |
| chr5  | 93903713  | 93905537  | KIAA0825      | 21434  |
| chr2  | 149639151 | 149639580 | KIF5C         | 21106  |
| chr17 | 19092523  | 19093559  | SNORD3C       | 14836  |
| chr5  | 134258935 | 134264319 | PCBD2         | 14740  |
| chr17 | 27047253  | 27048223  | RPL23a        | 12577  |
| chr11 | 62432719  | 62433383  | SNORA57       | 11323  |
| chr3  | 52725390  | 52725804  | SNORD19.1     | 11295  |
| chr17 | 7479512   | 7482522   | SNORD10       | 10714  |
| chr5  | 60057208  | 60057576  | ELOVL7        | 10704  |
| chr17 | 74554508  | 74555419  | SNORD1C       | 10206  |
| chr2  | 89155530  | 89157882  | IGKC          | 9958   |
| chr22 | 39714874  | 39715416  | RPL3          | 9929   |
| chr6  | 26156556  | 26159443  | HIST1H1E      | 7650   |
| chrX  | 153626578 | 153629796 | RPL10         | 5959   |
| chr1  | 161409744 | 161410046 | tRNA          | 5524   |
| chr15 | 65597014  | 65597571  | RNU5B-1       | 4971   |
| chr1  | 149856801 | 149860791 | HIST2H2BE     | 4911   |
| chr17 | 79476814  | 79479417  | ACTG1         | 4791   |
| chr15 | 25330380  | 25330799  | SNORD116-18   | 4719   |
| chr15 | 25296283  | 25296860  | SNORD116-1    | 4698   |
| chr12 | 7076176   | 7077290   | PHB2          | 4600   |
| chr8  | 101729524 | 101731076 | PABPC1        | 4426   |
| chr15 | 25339184  | 25339448  | SNORD116-24   | 4425   |
| chr11 | 65266516  | 65274171  | MALAT1        | 4140   |
| chr1  | 149679895 | 149680702 | tRNA          | 4081   |
| chr15 | 45492151  | 45492730  | tRNA          | 3945   |
| chr11 | 68227166  | 68227703  | Pseudogenes   | 3780   |
| chr6  | 27860000  | 27860962  | HIST1H2AM     | 3758   |
| chr14 | 102550579 | 102552728 | HSP90AA1      | 3725   |
| chr6  | 74226861  | 74230298  | EEF1A1        | 3697   |
| chr5  | 99381740  | 99382414  | Pseudogenes   | 3685   |
| chr20 | 37061977  | 37062996  | SNORA71D      | 3630   |
| chr15 | 25335070  | 25335326  | SNORD116-22   | 3478   |

|       |           |           |             |      |
|-------|-----------|-----------|-------------|------|
| chr16 | 2010800   | 2013254   | RPS2        | 3446 |
| chr17 | 41464449  | 41464974  | RNU2-4P     | 3343 |
| chr12 | 112704597 | 112705271 | 7SK.58      | 3262 |
| chr11 | 27909546  | 27912612  | Pseudogenes | 3050 |
| chr15 | 25351284  | 25351911  | SNORD116-29 | 2929 |

---

Top 50 enriched peaks (pull-down versus input) by number of sequence tags. Chr, chromosome number; Gene ID, HGNC Symbol. Coordinates listed are based upon human genome assembly GRCh39/hg19.



**Supplemental Table 4: Genes significantly dysregulated specifically in 4p16 subtype, compared to 5 other major subtypes.**

| Probe set ID | 4p16 vs. D2 | 4p16 vs. D1+D2 | 4p16 vs. MAF | 4p16 vs. D1 | 4p16 vs. 11q13 | Gene symbol | Chromosome location |
|--------------|-------------|----------------|--------------|-------------|----------------|-------------|---------------------|
| 1557780_at   | 8.815170521 | 8.227863196    | 7.915054774  | 8.695246881 | 7.789189389    | NA          | NA                  |
| 209052_s_at  | 11.87530979 | 12.11755821    | 10.08957466  | 12.44266003 | 10.71741204    | WHSC1       | 4p16.3              |
| 209053_s_at  | 26.52188818 | 27.34280811    | 15.40828333  | 28.47863657 | 19.39515913    | WHSC1       | 4p16.3              |
| 209054_s_at  | 10.62433479 | 10.41839947    | 8.466851726  | 11.53095477 | 8.866102081    | WHSC1       | 4p16.3              |
| 211709_s_at  | 2.445295292 | 2.812534411    | 2.62452927   | 2.69840074  | 2.757718771    | CLEC11A     | 19q13.3             |
| 217901_at    | 6.440010094 | 7.537449546    | 11.27697576  | 8.226886552 | 7.465536199    | DSG2        | 18q12.1             |
| 222777_s_at  | 33.19548125 | 29.33012687    | 24.8285743   | 29.88648636 | 24.65156524    | WHSC1       | 4p16.3              |
| 222778_s_at  | 14.00362924 | 13.0218553     | 13.55580564  | 15.66522887 | 11.95288327    | WHSC1       | 4p16.3              |
| 223472_at    | 18.89567231 | 19.07338158    | 19.01779111  | 19.36068639 | 15.9127712     | WHSC1       | 4p16.3              |
| 225530_at    | 0.24755202  | 0.200473517    | 0.122993653  | 0.183763481 | 0.204005076    | MOBK12A     | 19p13.3             |
| 236565_s_at  | 2.546004331 | 2.706020348    | 2.785394759  | 2.627202031 | 2.750105773    | LARP6       | 15q23               |
| 238012_at    | 0.270036646 | 0.316268589    | 0.251063552  | 0.347021352 | 0.317594463    | DPP7        | 9q34.3              |
| 214464_at    | 4.306084946 | 4.658893574    | 3.688346541  | 4.516948218 | 4.573322929    | CDC42BPA    | 1q42.11             |
| 220266_s_at  | 8.553007833 | 8.184115744    | 5.416095438  | 6.520860238 | 6.741678726    | KLF4        | 9q31                |
| 1553105_s_at | 4.399273258 | 4.801983384    | 6.397106238  | 5.421413173 | 4.721582823    | DSG2        | 18q12.1             |
| 205131_x_at  | 1.675377853 | 1.749206524    | 1.715729667  | 1.713043323 | 1.765391146    | CLEC11A     | 19q13.3             |
| 223313_s_at  | 3.214420707 | 3.755610794    | 2.995796185  | 3.934112949 | 1.934120458    | NA          | NA                  |
| 204379_s_at  | 53.10680846 | 44.16169171    | 52.53577134  | 52.10784015 | 51.66151385    | FGFR3       | 4p16.3              |
| 227084_at    | 2.214427653 | 2.203161014    | 2.602520447  | 2.250684408 | 2.496368547    | DTNA        | 18q12               |
| 210220_at    | 2.322378538 | 2.116120445    | 3.120458066  | 2.404499858 | 2.299781936    | FZD2        | 17q21.1             |
| 201911_s_at  | 1.591800943 | 1.903426713    | 1.598952555  | 1.783279705 | 1.62155216     | FARP1       | 13q32.2             |
| 217867_x_at  | 2.082503273 | 2.425476828    | 2.40008601   | 2.486016021 | 2.497593397    | BACE2       | 21q22.3             |
| 242311_x_at  | 1.658540194 | 1.597445734    | 1.562988446  | 1.591237229 | 1.435965538    | NA          | NA                  |
| 229344_x_at  | 1.671920494 | 1.643507507    | 1.826168489  | 1.683433657 | 1.60725015     | RIMKLB      | 12p13.31            |
| 221261_x_at  | 4.493010097 | 5.86338116     | 3.475028669  | 5.905433063 | 2.032994351    | NA          | NA                  |
| 222372_at    | 2.055266249 | 2.245334343    | 2.58871626   | 2.324751555 | 2.640498956    | NA          | NA                  |
| 41220_at     | 0.606076458 | 0.5415375      | 0.384938722  | 0.450240775 | 0.399026387    | SEPT9       | 17q25               |
| 207233_s_at  | 2.610627877 | 2.717029621    | 1.927748421  | 3.297512897 | 3.035929294    | MITF        | 3p14.2-p14.1        |
| 204749_at    | 2.328954513 | 3.253976627    | 2.985813743  | 3.04958246  | 2.560164373    | NAP1L3      | Xq21.3-q22          |
| 201360_at    | 3.571902014 | 6.435774117    | 5.0850233    | 6.622779026 | 4.802183961    | CST3        | 20p11.21            |
| 200897_s_at  | 2.738177869 | 2.399571804    | 3.01144564   | 2.902145484 | 2.589543608    | PALLD       | 4q32.3              |
| 240125_at    | 1.618797757 | 1.564557023    | 1.753359165  | 1.627217017 | 1.618095725    | NA          | NA                  |
| 212372_at    | 3.495461628 | 3.055882005    | 4.889829599  | 4.20992056  | 4.248552251    | MYH10       | 17p13               |
| 218675_at    | 2.610414754 | 2.795993633    | 3.361038028  | 2.617254842 | 1.874795772    | SLC22A17    | 14q11.2             |
| 221841_s_at  | 23.73227007 | 19.1701072     | 9.69666219   | 12.43933921 | 14.78790003    | KLF4        | 9q31                |
| 219122_s_at  | 0.415633849 | 0.392098226    | 0.49208587   | 0.272952546 | 0.622515156    | THG1L       | 5q33.3              |
| 223821_s_at  | 1.577888723 | 1.725730591    | 1.723538057  | 1.67261502  | 1.679422425    | SUSD4       | 1q41                |
| 233240_at    | 2.841677202 | 2.922287507    | 3.096377197  | 2.637939912 | 2.114802354    | NA          | NA                  |
| 212771_at    | 3.605468743 | 3.019918804    | 7.596879137  | 4.281159484 | 10.0760003     | FAM171A1    | 10p13               |
| 201910_at    | 1.483881895 | 1.484876423    | 1.598675179  | 1.542445789 | 1.503481568    | FARP1       | 13q32.2             |
| 227290_at    | 1.509740162 | 1.570809544    | 1.545073093  | 1.535588075 | 1.519692773    | NA          | NA                  |
| 210783_x_at  | 1.37678931  | 1.471427636    | 1.535083359  | 1.45041143  | 1.471468229    | CLEC11A     | 19q13.3             |
| 218775_s_at  | 1.855061846 | 1.740861651    | 1.989558761  | 1.875312265 | 1.720081117    | WWC2        | 4q35.1              |
| 205573_s_at  | 2.458978011 | 2.706439419    | 2.570775024  | 2.485169006 | 1.849952702    | SNX7        | 1p21.3              |
| 200981_x_at  | 1.480935971 | 1.531422695    | 1.865977484  | 1.732854411 | 1.305536928    | GNAS        | 20q13.3             |
| 200780_x_at  | 1.483881618 | 1.574185143    | 1.872610089  | 1.765714699 | 1.313067632    | GNAS        | 20q13.3             |
| 238569_at    | 1.414373539 | 1.630058525    | 1.541833484  | 1.622661338 | 1.608863855    | GABBR1      | 6p21.31             |
| 200907_s_at  | 2.021629851 | 1.80283166     | 2.235581799  | 1.973906585 | 1.92715494     | PALLD       | 4q32.3              |
| 204380_s_at  | 7.356094478 | 7.003862142    | 7.574083189  | 7.427997251 | 7.526320805    | FGFR3       | 4p16.3              |
| 204121_at    | 2.013302357 | 1.956067147    | 1.788163484  | 2.052116062 | 2.124034456    | GADD45G     | 9q22.1-q22.2        |
| 201922_at    | 0.527308371 | 0.473108209    | 0.659293637  | 0.437535357 | 0.636784339    | NSA2        | 5q13.3              |
| 204518_s_at  | 3.047652254 | 2.78655103     | 2.958807567  | 3.622497052 | 3.756292903    | PPIC        | 5q23.2              |
| 228237_at    | 1.379254759 | 1.465733561    | 1.576070022  | 1.481044226 | 1.608392657    | PAPPA2      | 1q23-q25            |
| 222738_at    | 1.437051237 | 1.472277721    | 1.44535218   | 1.467141244 | 1.353009985    | WWC2        | 4q35.1              |
| 214548_x_at  | 1.523469448 | 1.562387857    | 1.978121224  | 1.795069257 | 1.357703839    | GNAS        | 20q13.3             |
| 222446_s_at  | 1.655946344 | 1.949049557    | 1.837119143  | 1.884637364 | 1.89795244     | BACE2       | 21q22.3             |
| 219631_at    | 2.185049559 | 2.552666262    | 2.964170266  | 2.28757194  | 2.338804217    | LRP12       | 8q22.2-q23.1        |
| 212273_x_at  | 1.481867708 | 1.553894386    | 1.860832308  | 1.763823283 | 1.308655351    | GNAS        | 20q13.3             |
| 217807_s_at  | 0.564801118 | 0.492401268    | 0.504572797  | 0.381614485 | 0.533354714    | GLTSCR2     | 19q13.3             |
| 226313_at    | 1.399131145 | 1.51492661     | 1.649587526  | 1.397606891 | 1.348005457    | C10orf35    | 10q22.1             |
| 203794_at    | 1.467182588 | 1.601629096    | 1.440519918  | 1.520166624 | 1.585593711    | CDC42BPA    | 1q42.11             |
| 205011_at    | 2.108086178 | 2.155855803    | 1.798362011  | 2.760624974 | 1.744459448    | VWASA       | 11q23               |

|              |             |             |             |             |             |            |                |
|--------------|-------------|-------------|-------------|-------------|-------------|------------|----------------|
| 212190_at    | 9.916491953 | 6.95380817  | 9.084570422 | 6.15741251  | 4.778067922 | SERPINE2   | 2q33-q35       |
| 227641_at    | 0.364489004 | 0.306388394 | 0.590063553 | 0.443972378 | 0.318980266 | FBXL16     | 16p13.3        |
| 225698_at    | 0.429111013 | 0.440137964 | 0.543468787 | 0.290775996 | 0.512081746 | NCRNA00219 | 5q21-q22       |
| 224572_s_at  | 2.174035588 | 2.364066986 | 1.831363847 | 2.77072684  | 1.548876796 | IRF2BP2    | 1q42.3         |
| 219550_at    | 1.517965013 | 1.730428147 | 1.840703762 | 1.642775746 | 1.972088912 | ROBO3      | 11q24.2        |
| 212813_at    | 1.801500508 | 1.782484934 | 2.223439735 | 2.028195471 | 2.081992568 | JAM3       | 11q25          |
| 238116_at    | 1.656342465 | 1.751474691 | 1.804894032 | 1.703936579 | 1.751551163 | DYNLRB2    | 16q23.3        |
| 1554762_a_at | 1.394923648 | 1.419460048 | 1.622613794 | 1.415022308 | 1.387706311 | WWC2       | 4q35.1         |
| 1557803_at   | 2.051290585 | 2.144233387 | 2.271673665 | 2.096588289 | 2.25966435  | NA         | NA             |
| 232235_at    | 3.754473483 | 4.807719855 | 4.471475241 | 3.878046489 | 2.637620077 | DSEL       | 18q22.1        |
| 233792_at    | 1.59030715  | 1.685577968 | 1.609730477 | 1.58963361  | 1.421357116 | NA         | NA             |
| 204066_s_at  | 2.863165963 | 2.528657242 | 2.636361951 | 2.912723019 | 3.869079129 | AGAP1      | 2q37           |
| 228745_at    | 0.43827529  | 0.422720626 | 0.35528796  | 0.448360848 | 0.438922867 | SGTB       | 5q12.3         |
| 225536_at    | 1.345171489 | 1.439143738 | 1.710364668 | 1.430636068 | 1.487784593 | TMEM54     | 1p35-p34       |
| 227195_at    | 2.33941018  | 2.186592118 | 2.821924182 | 2.534775033 | 2.9606179   | ZNF503     | 10q22.2        |
| 217673_x_at  | 1.305922798 | 1.354887988 | 1.746366822 | 1.540131242 | 1.271760393 | GNAS       | 20q13.3        |
| 204069_at    | 1.606703726 | 1.80496345  | 1.718372592 | 1.677370695 | 1.673494558 | MEIS1      | 2p14-p13       |
| 239297_at    | 1.739233203 | 1.905918642 | 2.154991646 | 1.980757679 | 2.006310501 | C8orf79    | 8p22           |
| 1556545_at   | 4.230664582 | 3.880388896 | 12.83385401 | 3.586528409 | 2.153619717 | NA         | NA             |
| 212504_at    | 1.397079953 | 1.537876584 | 1.666068587 | 1.442809037 | 1.544875383 | DIP2C      | 10p15.3        |
| 235501_at    | 1.838236733 | 1.955521157 | 1.98503782  | 1.928779076 | 1.590628788 | NA         | NA             |
| 230941_at    | 1.517926086 | 1.561051927 | 1.624238583 | 1.487662045 | 1.554513007 | LOC728537  | 2q11.2         |
| 219389_at    | 1.222757162 | 1.374154155 | 1.320110507 | 1.283825028 | 1.331217945 | SUSD4      | 1q41           |
| 211276_at    | 3.357813263 | 3.501630374 | 2.883217407 | 3.391335976 | 1.880400392 | TCEAL2     | Xq22.1-q22.3   |
| 202105_at    | 0.631590829 | 0.634122403 | 0.659709972 | 0.555383203 | 0.601516352 | IGBP1      | Xq13.1-q13.3   |
| 200809_x_at  | 0.689273813 | 0.668748261 | 0.719254344 | 0.645730009 | 0.719286597 | RPL12      | 9q34           |
| 1563881_at   | 1.204775797 | 1.245064452 | 1.352605677 | 1.272772384 | 1.338773045 | NA         | NA             |
| 200819_s_at  | 0.706314508 | 0.670207139 | 0.805241712 | 0.667823352 | 0.841297473 | RPS15      | 19p13.3        |
| 1566539_at   | 1.248240854 | 1.297327657 | 1.396379855 | 1.312821498 | 1.378588357 | NA         | NA             |
| 221582_at    | 2.403166785 | 2.807523088 | 4.411791222 | 3.153626022 | 3.081966291 | HIST3H2A   | 1q42.13        |
| 226164_x_at  | 1.356015272 | 1.366580196 | 1.322263084 | 1.346309146 | 1.271210239 | RIMKLB     | 12p13.31       |
| 223279_s_at  | 1.48752948  | 1.636445456 | 2.019243404 | 1.876286616 | 2.240444312 | UACA       | 15q22-q24      |
| 244397_at    | 2.060544578 | 2.258819729 | 2.32326456  | 1.68628017  | 1.662707719 | NA         | NA             |
| 232859_s_at  | 1.221248708 | 1.284972145 | 1.497066389 | 1.308597958 | 1.40559385  | MAG1       | 3p14.1         |
| 207585_s_at  | 0.641312297 | 0.559386445 | 0.660465702 | 0.587363999 | 0.593841807 | RPL36AL    | 14q21          |
| 207321_s_at  | 2.055980435 | 2.902913467 | 2.259314972 | 2.605038472 | 1.693951792 | ABCB9      | 12q24          |
| 223822_at    | 1.448940727 | 1.586222312 | 1.426062081 | 1.547568902 | 1.5412525   | SUSD4      | 1q41           |
| 211858_x_at  | 1.442396514 | 1.555142171 | 1.917694325 | 1.751850238 | 1.338182068 | GNAS       | 20q13.3        |
| 218651_s_at  | 1.52944239  | 1.619645302 | 1.562172771 | 1.538901613 | 1.611826932 | LARP6      | 15q23          |
| 224569_s_at  | 1.918235487 | 1.946592158 | 1.54464306  | 2.529824125 | 1.369656483 | IRF2BP2    | 1q42.3         |
| 203952_at    | 1.483008824 | 1.96262961  | 1.969289597 | 2.078577821 | 1.770625334 | ATF6       | 1q22-q23       |
| 211776_s_at  | 1.297870324 | 1.341228754 | 1.319344926 | 1.276999593 | 1.239040167 | EPB41L3    | 18p11.32       |
| 236899_at    | 2.083313834 | 2.069534422 | 2.023762367 | 2.061108353 | 1.613251784 | NA         | NA             |
| 220254_at    | 1.510742359 | 1.71077259  | 1.80604258  | 1.629718796 | 1.602701462 | LRP12      | 8q22.2-q23.1   |
| 226771_at    | 1.601002078 | 2.068365132 | 1.650863631 | 2.085364577 | 2.147208767 | ATP8B2     | 1q21.3         |
| 201037_at    | 1.744183325 | 1.87895871  | 2.029520498 | 1.846473119 | 1.750883372 | PFKP       | 10p15.3-p15.2  |
| 205741_s_at  | 1.337295448 | 1.369870411 | 1.400082623 | 1.36600872  | 1.371896935 | DTNA       | 18q12          |
| 200091_s_at  | 0.715370904 | 0.680802729 | 0.719462518 | 0.626401197 | 0.720190234 | RPS25      | 11q23.3        |
| 240255_at    | 1.30256069  | 1.440254433 | 1.454492023 | 1.295805397 | 1.383258777 | NA         | NA             |
| 227341_at    | 1.79449737  | 1.944961648 | 1.87393896  | 1.861628224 | 1.809993015 | BEND7      | 10p13          |
| 218495_at    | 0.639928943 | 0.71927346  | 0.760376263 | 0.729499871 | 0.680676933 | UXT        | Xp11.23-p11.22 |
| 200926_at    | 0.776312217 | 0.747309097 | 0.750463705 | 0.717631437 | 0.792970629 | RPS23      | 5q14.2         |
| 203667_at    | 0.69429378  | 0.592331839 | 0.68769305  | 0.639306329 | 0.849847217 | TBCA       | 5q14.1         |
| 205975_s_at  | 2.037758031 | 2.318716722 | 2.663365871 | 2.372046781 | 2.529421367 | HOXD1      | 2q31.1         |
| 224935_at    | 0.548840496 | 0.492715545 | 0.553551003 | 0.631230505 | 0.729048776 | EIF2S3     | Xp22.2-p22.1   |
| 221798_x_at  | 0.620195286 | 0.616412153 | 0.728513482 | 0.595383055 | 0.66952806  | RPS2       | 16p13.3        |
| 200012_x_at  | 0.73622738  | 0.680049267 | 0.808057447 | 0.637289065 | 0.718583439 | RPL21      | 13q12.2        |
| 218510_x_at  | 1.372219197 | 1.393879898 | 1.414540856 | 1.455742597 | 1.412131564 | FAM134B    | 5p15.1         |
| 222651_s_at  | 1.391252515 | 1.371202779 | 1.356389808 | 1.474706783 | 1.279242235 | TRPS1      | 8q24.12        |
| 204042_at    | 1.459167082 | 1.409868148 | 1.380839584 | 1.394814047 | 1.36078693  | WASF3      | 13q12          |
| 201215_at    | 2.298496921 | 2.69410256  | 2.555010135 | 2.618187084 | 2.661151679 | PLS3       | Xq23           |
| 202708_s_at  | 3.053372951 | 4.932384266 | 6.324854872 | 3.006196136 | 1.852429756 | HIST2H2BE  | 1q21-q23       |
| 200814_at    | 0.752223252 | 0.681057245 | 0.671002742 | 0.70522953  | 0.704645056 | PSME1      | 14q11.2        |
| 200088_x_at  | 0.717343214 | 0.696728448 | 0.732115784 | 0.66532209  | 0.733141638 | RPL12      | 9q34           |
| 229050_s_at  | 0.568782617 | 0.52883982  | 0.658661776 | 0.378406262 | 0.692032424 | NA         | NA             |
| 229797_at    | 1.249075724 | 1.307066292 | 1.38422545  | 1.311931492 | 1.276699759 | MCOLN3     | 1p22.3         |
| 1557014_a_at | 1.206526552 | 1.294008237 | 1.27220248  | 1.252993558 | 1.245498755 | C9orf122   | 9p13.1         |
| 239246_at    | 1.593166142 | 1.652120199 | 1.551898273 | 1.64868484  | 1.481107807 | FARP1      | 13q32.2        |
| 230134_s_at  | 0.630879075 | 0.615614499 | 0.731792185 | 0.652013829 | 0.778760771 | RC3H2      | 9q34           |

|              |             |             |             |             |             |           |                |
|--------------|-------------|-------------|-------------|-------------|-------------|-----------|----------------|
| 214317_x_at  | 0.738095045 | 0.748892398 | 0.811692218 | 0.645760153 | 0.796509432 | RPS9      | 19q13.4        |
| 1553998_at   | 1.860484403 | 1.988053527 | 1.900284392 | 1.811597329 | 1.511358311 | NA        | NA             |
| 230748_at    | 0.451323601 | 0.272412143 | 0.417675435 | 0.22859083  | 0.415459629 | SLC16A6   | 17q24.2        |
| 215047_at    | 2.040813971 | 2.295159414 | 1.899655302 | 1.988168391 | 2.174279791 | TRIM58    | 1q44           |
| 225474_at    | 1.294972837 | 1.423683845 | 1.502925853 | 1.353763651 | 1.40543924  | MAGI1     | 3p14.1         |
| 1554420_at   | 2.532568554 | 2.555045369 | 3.188827709 | 2.636065416 | 1.77834286  | ATF3      | 1q32.3         |
| 200715_x_at  | 0.484849614 | 0.458540626 | 0.569147033 | 0.332955005 | 0.630884622 | RPL13A    | 19q13.3        |
| 1405_i_at    | 3.069401505 | 2.973393576 | 2.76858801  | 2.256691915 | 1.713478117 | CCL5      | 17q11.2-q12    |
| 237086_at    | 3.572787988 | 3.873899095 | 3.633361491 | 3.451992872 | 3.596803821 | FOXA1     | 14q12-q13      |
| 215440_s_at  | 3.11286201  | 5.927024046 | 3.108304642 | 3.434632407 | 1.997215474 | BEX4      | Xq22.1-q22.3   |
| 221726_at    | 0.51146524  | 0.524081282 | 0.65276439  | 0.432928488 | 0.555842856 | RPL22     | 1p36.3-p36.2   |
| 217256_x_at  | 0.64813777  | 0.616975326 | 0.791687956 | 0.634057727 | 0.826972058 | RPL36A    | Xq22.1         |
| 201258_at    | 0.724366323 | 0.6807848   | 0.710192267 | 0.622765756 | 0.70427638  | RPS16     | 19q13.1        |
| 212790_x_at  | 0.784727629 | 0.724386762 | 0.737297161 | 0.671746037 | 0.782073826 | RPL13A    | 19q13.3        |
| 32209_at     | 1.39749807  | 1.680819295 | 1.459129202 | 1.625668474 | 1.791709983 | FAM89B    | 11q23          |
| 227892_at    | 1.325455608 | 1.359556147 | 1.401071177 | 1.366002873 | 1.3503695   | PRKAA2    | 1p31           |
| 201174_s_at  | 1.715492956 | 1.720103577 | 1.670106749 | 1.540121132 | 1.440461627 | TERF2IP   | 16q23.1        |
| 244852_at    | 1.659054013 | 1.811744439 | 1.753883974 | 1.724030916 | 1.478840295 | DSEL      | 18q22.1        |
| 213890_x_at  | 0.816226146 | 0.798662808 | 0.816186175 | 0.759957763 | 0.807716553 | RPS16     | 19q13.1        |
| 200651_at    | 0.64542032  | 0.585205498 | 0.76129096  | 0.574731781 | 0.798937956 | GNB2L1    | 5q35.3         |
| 226140_s_at  | 2.25349685  | 3.295001388 | 1.892376263 | 2.440956157 | 1.774724621 | OTUD1     | 10p12.2        |
| 210646_x_at  | 0.812443671 | 0.765214831 | 0.770746116 | 0.708231361 | 0.811734326 | RPL13A    | 19q13.3        |
| 213627_at    | 1.433982666 | 1.528351917 | 1.486146437 | 1.787823748 | 1.472125292 | MAGED2    | Xp11.2         |
| 1565681_s_at | 1.286395121 | 1.417250601 | 1.613731894 | 1.350457736 | 1.489009568 | DIP2C     | 10p15.3        |
| 223003_at    | 0.649578931 | 0.645796067 | 0.64290486  | 0.513538137 | 0.843146747 | C1orf43   | 19p13.2        |
| 200716_x_at  | 0.773862347 | 0.739179966 | 0.748778034 | 0.684261902 | 0.7893423   | RPL13A    | 19q13.3        |
| 201681_s_at  | 1.767902623 | 2.138774909 | 1.838831979 | 1.866502133 | 1.411188253 | DLG5      | 10q23          |
| 232653_at    | 1.34453998  | 1.459573106 | 1.317384932 | 1.439607513 | 1.206591053 | NA        | NA             |
| 228598_at    | 1.185808989 | 1.216749676 | 1.201353376 | 1.201054514 | 1.214536238 | DPP10     | 2q14.1         |
| 220960_x_at  | 0.767863868 | 0.786683192 | 0.782663468 | 0.753388249 | 0.777334007 | RPL22     | 1p36.3-p36.2   |
| 202672_s_at  | 2.768877186 | 2.692671044 | 3.421454644 | 3.63356772  | 2.202649886 | ATF3      | 1q32.3         |
| 213588_x_at  | 0.687687821 | 0.646748764 | 0.770644833 | 0.640669793 | 0.848144668 | RPL14     | 3p22-p21.2     |
| 208682_s_at  | 1.491282502 | 1.606816219 | 1.567784066 | 1.868100117 | 1.428876904 | MAGED2    | Xp11.2         |
| 1556633_at   | 1.31549071  | 1.370329376 | 1.380701656 | 1.382516645 | 1.209629511 | C1orf204  | 1q23.2         |
| 228601_at    | 1.560270915 | 1.647404583 | 1.761193119 | 1.674735735 | 1.717681684 | LOC401022 | 2q31.2         |
| 212686_at    | 1.5801597   | 1.53841582  | 1.727575791 | 1.513558251 | 1.466241591 | PPM1H     | 12q14.1-q14.2  |
| 214271_x_at  | 0.737449411 | 0.709950974 | 0.742482122 | 0.679727058 | 0.76487868  | RPL12     | 9q34           |
| 201106_at    | 0.64320731  | 0.710519101 | 0.643171107 | 0.593537511 | 0.84334645  | GPX4      | 19p13.3        |
| 217927_at    | 1.27178001  | 1.488356301 | 1.387532014 | 1.502109751 | 1.301769816 | SPCS1     | 3p21.1         |
| 223901_at    | 1.27789103  | 1.321427088 | 1.295234154 | 1.291541971 | 1.417294393 | SYT3      | 19q13.33       |
| 216873_s_at  | 1.293305131 | 1.524060428 | 1.443455768 | 1.700174818 | 1.599061495 | ATP8B2    | 1q21.3         |
| 1555370_a_at | 1.514808433 | 1.661154545 | 1.553448751 | 1.54070784  | 1.49175535  | CAMTA1    | 1p36.31-p36.23 |
| 200016_x_at  | 0.760595138 | 0.711606411 | 0.819235232 | 0.71207921  | 0.851724877 | HNRNPA1   | 12q13.1        |
| 231035_s_at  | 2.272396447 | 3.669171651 | 2.044183115 | 2.517617512 | 2.12543317  | OTUD1     | 10p12.2        |
| 224814_at    | 0.439105934 | 0.4992916   | 0.543627053 | 0.413008225 | 0.552485769 | DPP7      | 9q34.3         |
| 227796_at    | 0.584597795 | 0.520116218 | 0.555750895 | 0.472763867 | 0.64652925  | ZFP62     | 5q35.3         |
| 1559826_a_at | 1.793831873 | 2.016607132 | 2.269346683 | 1.884071357 | 2.041453179 | LOC401074 | 3p12.3         |
| 221024_s_at  | 2.382471162 | 5.018119285 | 5.480989626 | 3.141043327 | 2.000405616 | SLC2A10   | 20q13.1        |
| 208729_x_at  | 1.414322342 | 1.826858883 | 1.312173547 | 1.785822473 | 1.67468444  | HLA-B     | 6p21.3         |
| 204065_at    | 1.203139091 | 1.374241064 | 1.407565353 | 1.274206761 | 1.375862632 | CHST10    | 2q11.2         |
| 204655_at    | 2.518493356 | 2.226914354 | 2.211228449 | 1.889596411 | 1.446690207 | CCL5      | 17q11.2-q12    |
| 218546_at    | 1.475196691 | 1.716234495 | 1.445607148 | 1.465866837 | 1.838567347 | C1orf115  | 1q41           |
| 224570_s_at  | 2.059507924 | 2.361424107 | 1.644831367 | 2.74312296  | 1.428642015 | IRF2BP2   | 1q42.3         |
| 1557410_at   | 1.41652687  | 1.500906637 | 1.498300014 | 1.280012424 | 1.262236638 | NA        | NA             |
| 1559889_at   | 1.482554159 | 1.437859509 | 1.637573628 | 1.366871432 | 1.291896325 | NA        | NA             |
| 209409_at    | 1.476079436 | 1.546298222 | 1.4447      | 1.422922605 | 1.479561093 | GRB10     | 7p12-p11.2     |
| 243225_at    | 1.336609062 | 1.334458682 | 1.369231535 | 1.346489043 | 1.289325888 | LOC283481 | 13q33.1        |
| 213356_x_at  | 0.745193958 | 0.722348264 | 0.830815098 | 0.723324758 | 0.866164964 | NA        | NA             |
| 216526_x_at  | 1.19644267  | 1.314181125 | 1.222062999 | 1.437254637 | 1.298684763 | HLA-C     | 6p21.3         |
| 223334_at    | 0.569243443 | 0.55638359  | 0.676896784 | 0.537172557 | 0.714726807 | TMEM126A  | 11q14.1        |
| 232825_s_at  | 1.513925951 | 1.633245508 | 1.558404819 | 1.536951045 | 1.404508496 | DSEL      | 18q22.1        |
| 221729_at    | 1.322857017 | 1.388447747 | 1.294495738 | 1.344287623 | 1.326053517 | COL5A2    | 2q14-q32       |
| 218532_s_at  | 1.570595194 | 1.573677281 | 1.48788005  | 1.510118848 | 1.410250911 | FAM134B   | 5p15.1         |
| 227996_at    | 1.37249342  | 1.426133776 | 1.310720347 | 1.379717702 | 1.315314459 | FARP1     | 13q32.2        |
| 211939_x_at  | 0.708893585 | 0.644506196 | 0.764489446 | 0.642389311 | 0.805170538 | BTF3      | 5q13.2         |
| 200705_s_at  | 0.712188431 | 0.716355416 | 0.699891899 | 0.650873381 | 0.831724791 | EEF1B2    | 2q33-q34       |
| 1559827_at   | 1.75928102  | 2.072694348 | 1.930408372 | 2.083999855 | 2.130520211 | LOC401074 | 3p12.3         |
| 201406_at    | 0.672644365 | 0.674286825 | 0.767676575 | 0.655509138 | 0.83645124  | RPL36A    | Xq22.1         |
| 225525_at    | 1.256646042 | 1.321186446 | 1.289486438 | 1.289885978 | 1.301544849 | KIAA1671  | 22q11.23       |
| 1555968_a_at | 2.718216828 | 3.026299859 | 4.250673321 | 2.086848521 | 1.876347272 | NA        | NA             |

|              |             |             |             |             |             |           |               |
|--------------|-------------|-------------|-------------|-------------|-------------|-----------|---------------|
| 229782_at    | 3.088575868 | 3.251476055 | 2.957998752 | 3.157509603 | 3.039122848 | RMST      | NA            |
| 226726_at    | 1.368131727 | 1.337597945 | 1.332942364 | 1.26658765  | 1.292920246 | MBOAT2    | 2p25.1        |
| 202355_s_at  | 0.722656539 | 0.70862222  | 0.849804025 | 0.668314263 | 0.85078957  | GTF2F1    | 19p13.3       |
| 202052_s_at  | 1.503750617 | 1.576554209 | 1.483128944 | 1.356122794 | 1.503081947 | RAI14     | 5p13.3-p13.2  |
| 229139_at    | 1.469630249 | 1.46586241  | 1.411722021 | 1.470336676 | 1.462306652 | JPH1      | 8q21          |
| 214209_s_at  | 1.988177668 | 3.025119712 | 2.249778277 | 2.692747673 | 1.600094509 | ABCB9     | 12q24         |
| 220201_at    | 0.638051348 | 0.534846877 | 0.638556462 | 0.473647705 | 0.70651857  | RC3H2     | 9q34          |
| 212503_s_at  | 1.446201238 | 1.611207207 | 1.599266761 | 1.5236439   | 1.581050686 | DIP2C     | 10p15.3       |
| 228240_at    | 1.306558728 | 1.344377955 | 1.309305604 | 1.291430795 | 1.582967977 | NA        | NA            |
| 1556794_at   | 1.165483915 | 1.217044649 | 1.222368498 | 1.185482105 | 1.188516274 | NA        | NA            |
| 201345_s_at  | 0.699725835 | 0.705259816 | 0.778670944 | 0.694866488 | 0.863691373 | UBE2D2    | 5q31.2        |
| 219748_at    | 1.369080309 | 1.464205841 | 1.490660311 | 1.637543154 | 1.61819932  | TREML2    | 6p21.1        |
| 1560625_s_at | 1.376052362 | 1.5315974   | 1.564130414 | 1.582903399 | 1.354708269 | NA        | NA            |
| 218694_at    | 3.368755992 | 3.761207486 | 2.6274697   | 3.113205102 | 2.964779219 | ARMCX1    | Xq21.33-q22.2 |
| 1555759_a_at | 2.060707408 | 1.806208607 | 1.865774102 | 1.570447846 | 1.356643362 | CCL5      | 17q11.2-q12   |
| 211942_x_at  | 0.712846335 | 0.713709022 | 0.751529685 | 0.666092245 | 0.815445042 | NA        | NA            |
| 223095_at    | 1.47199321  | 1.772420998 | 1.479670713 | 1.460334948 | 1.292531956 | MARVELD1  | 10q24.2       |
| 213943_at    | 2.118523536 | 2.281617217 | 2.151303162 | 2.157760179 | 2.218901629 | TWIST1    | 7p21.2        |
| 233981_at    | 0.867372286 | 0.82029174  | 0.819085373 | 0.817135744 | 0.89746773  | NA        | NA            |
| 206710_s_at  | 1.330706783 | 1.327807329 | 1.300776506 | 1.272602767 | 1.25626959  | EPB41L3   | 18p11.32      |
| 238155_at    | 1.281450325 | 1.356431127 | 1.41406435  | 1.155344988 | 1.26243193  | NA        | NA            |
| 200092_s_at  | 0.774062441 | 0.711509646 | 0.793491232 | 0.730220043 | 0.846719081 | RPL37     | 5p13          |
| 226084_at    | 2.540065348 | 3.314544639 | 2.731097067 | 3.436854764 | 1.884215019 | MAP1B     | 5q13          |
| 212233_at    | 2.266660341 | 2.836725828 | 2.489524323 | 2.964539735 | 1.776894401 | MAP1B     | 5q13          |
| 218435_at    | 0.594952546 | 0.529241133 | 0.544640045 | 0.620493481 | 0.662375932 | DNAJC15   | 13q14.1       |
| 208646_at    | 0.723675558 | 0.69838406  | 0.803110608 | 0.650985663 | 0.842610638 | NA        | NA            |
| 205104_at    | 1.219550549 | 1.3613506   | 1.404704193 | 1.26801731  | 1.259227725 | SNPH      | 20p13         |
| 235163_at    | 0.787286221 | 0.76845991  | 0.669756989 | 0.723943726 | 0.800380157 | MOBK2A    | 19p13.3       |
| 1554980_a_at | 1.900808562 | 2.408296434 | 2.376563434 | 2.647555999 | 1.862311275 | ATF3      | 1q32.3        |
| 226026_at    | 0.711276421 | 0.752162782 | 0.747012551 | 0.72597405  | 0.781667466 | DIRC2     | 3q21.1        |
| 202910_s_at  | 0.493088274 | 0.472669647 | 0.450400477 | 0.554304345 | 0.674191295 | CD97      | 19p13         |
| 220484_at    | 1.246868277 | 1.250346755 | 1.220972067 | 1.195686315 | 1.173693539 | MCOLN3    | 1p22.3        |
| 220606_s_at  | 0.732267966 | 0.588099563 | 0.652710723 | 0.596274964 | 0.797425933 | C17orf48  | 17p13.1       |
| 208904_s_at  | 0.827698967 | 0.879386279 | 0.87196546  | 0.776648491 | 0.900922633 | RPS28     | 19p13.2       |
| 212681_at    | 1.172630506 | 1.166823614 | 1.144623282 | 1.141754347 | 1.123964975 | EPB41L3   | 18p11.32      |
| 208697_s_at  | 0.642288428 | 0.578829834 | 0.638147559 | 0.599488047 | 0.689251427 | EIF3E     | 8q22-q23      |
| 224936_at    | 0.58820209  | 0.577211132 | 0.610963901 | 0.653085825 | 0.736258319 | EIF2S3    | Xp22.2-p22.1  |
| 202029_x_at  | 0.801060073 | 0.761818862 | 0.772678125 | 0.754601555 | 0.796107869 | RPL38     | 17q23-q25     |
| 221704_s_at  | 1.694236915 | 2.016297486 | 1.699826159 | 1.93884684  | 1.384317975 | VPS37B    | 12q24.31      |
| 200781_s_at  | 0.842054625 | 0.801348612 | 0.824460418 | 0.813499718 | 0.810637505 | RPS15A    | 16p           |
| 229336_at    | 1.201993159 | 1.265398627 | 1.297730358 | 1.264887427 | 1.120864475 | ST3GAL2   | 16q22.1       |
| 200834_s_at  | 0.762816752 | 0.777399895 | 0.752875603 | 0.749741223 | 0.796690655 | NA        | NA            |
| 200888_s_at  | 0.722434332 | 0.662737494 | 0.666703405 | 0.654076523 | 0.774060008 | RPL23     | 17q           |
| 1558541_at   | 1.170577293 | 1.287374078 | 1.233636197 | 1.195455345 | 1.250616461 | C8orf79   | 8p22          |
| 230326_s_at  | 0.730871406 | 0.651593367 | 0.749551262 | 0.653050057 | 0.748334845 | C11orf73  | 11q14.2       |
| 226474_at    | 1.80784706  | 1.822979284 | 1.422744334 | 1.672752049 | 1.634476081 | NLRC5     | 16q13         |
| 235851_s_at  | 1.610115213 | 1.984457414 | 1.800732043 | 1.583971939 | 1.375767741 | GNAS      | 20q13.3       |
| 219855_at    | 1.69035179  | 1.923800727 | 1.663870029 | 1.758279968 | 1.778147329 | NUDT11    | Xp11.22       |
| 221730_at    | 1.249878307 | 1.275655077 | 1.291635049 | 1.24039089  | 1.206968315 | COL5A2    | 2q14-q32      |
| 216592_at    | 1.691585212 | 2.180332704 | 2.424376283 | 1.637789854 | 1.866462983 | MAGEC3    | Xq27.2        |
| 238213_at    | 1.391897654 | 1.438233756 | 1.48187885  | 1.384451588 | 1.346919883 | NA        | NA            |
| 214434_at    | 1.17560529  | 1.244018865 | 1.192648974 | 1.223311486 | 1.168316065 | HSPA12A   | 10q26.12      |
| 229899_s_at  | 1.790245588 | 2.014400229 | 2.103258167 | 1.831620525 | 1.607849842 | C20orf199 | 20q13.13      |
| 213558_at    | 1.406872373 | 1.550434952 | 1.519718846 | 1.394192313 | 1.281727724 | PCLO      | 7q11.23-q21.3 |
| 243428_at    | 1.441491967 | 1.669519292 | 1.705709813 | 1.299384301 | 1.370553439 | KCNQ1OT1  | 11p15         |
| 208922_s_at  | 1.541332455 | 1.868837037 | 1.578785311 | 1.315917299 | 1.491821527 | NXF1      | 11q12-q13     |
| 221781_s_at  | 1.446299206 | 1.936812491 | 1.635240916 | 1.338633214 | 1.37165577  | DNAJC10   | 2q32.1        |
| 213227_at    | 1.589318455 | 1.965590735 | 1.542537365 | 1.357455786 | 1.380935013 | PGRMC2    | 4q26          |
| 243435_at    | 1.388045724 | 1.476743815 | 1.399756511 | 1.272134274 | 1.307432127 | KCNQ1OT1  | 11p15         |

Column 4p16 vs. D2, 4p16 vs. D1+D2, 4p16 vs. MAF, 4p16 vs. D1, 4p16 vs. 11q13 are the genes' fold changes in 4p16 subtype versus 5 other major subtypes: D2, D1+D2, MAF, D1, 11q13, respectively.

**Supplemental Table 5:** KEGG pathway analysis of genes associated with t(4;14).

| KEGGID | Term              | Size | Count | ExpCount | p-value               | Genes                                                                                                                           |
|--------|-------------------|------|-------|----------|-----------------------|---------------------------------------------------------------------------------------------------------------------------------|
| 3010   | Ribosome          | 88   | 18    | 0.871    | 4.8x10 <sup>-20</sup> | RPL12, RPL21, RPL22, RPL36AL, RPL37, RPL38, RPL36A, RPS2, RPS9, RPS15, RPS15A, RPS16, RPS23, RPS25, RPS28, RPL14, RPL23, RPL13A |
| 5416   | Viral myocarditis | 73   | 3     | 0.723    | 0.035                 | HLA-B, HLA-C, MYH10                                                                                                             |
| 4144   | Endocytosis       | 187  | 5     | 1.85     | 0.036                 | FGFR3, HLA-B, HLA-C, VPS37B, AGAP1                                                                                              |
| 4530   | Tight junction    | 134  | 4     | 1.33     | 0.043                 | MYH10, MAGI1, EPB41L3, JAM3                                                                                                     |

Term indicates the cellular pathway identified by the Kyoto Encyclopedia of Genes and Genomes (KEGG, [www.genome.jp/kegg](http://www.genome.jp/kegg)). Count shows the number of t(4;14)-associated genes found that belong to this pathway and ExpCount is the expected count by random chance. Size is the number of all genes for the corresponding pathway. The p-value is based on the hypergeometric test of gene enrichment. Only pathways with p<0.05 are included.

**Supplemental Table 6:** Oligonucleotide primer sequences used for cloning, RT-PCR, qRT-PCR and ACA11 knock-down.

| <b>Primers used in plasmid construction</b>      |                                                                                                                                                                                                             |
|--------------------------------------------------|-------------------------------------------------------------------------------------------------------------------------------------------------------------------------------------------------------------|
| ACA11                                            | Fw: 5' CCCAAGCTT GCGCTCACTAAG 3'<br>Rev: 5' GCTCTAGATGTTG TACTGAAAACCG 3'                                                                                                                                   |
| U23                                              | Fw: 5' CCCAAGCTTGTCTTCTCATT 3'<br>Rev: 5' GCTCTAGAGAATGTCTCACA 3'                                                                                                                                           |
| <b>Primers used in RT-PCR and qRT-PCR assays</b> |                                                                                                                                                                                                             |
| ACA11                                            | Fw: 5' GCGCTCACTAAGGCTCGG 3'<br>Rev: 5' TGTTG TACTGAAAACCG 3'                                                                                                                                               |
| GAPDH                                            | Fw: 5' CTCATGACCACAGTCCATGC 3'<br>Rev: 5' GGATGACCTTGCCACAG 3'                                                                                                                                              |
| UBC                                              | Fw: 5' ATTTGGGTCGCGGTTCTTG 3'<br>Rev: 5' TGCCTTGACATTCTCGATGGT 3'                                                                                                                                           |
| YWHAZ                                            | Fw: 5' ACTTTTGGTACATTGTGGCTTCAA 3'<br>Rev: 5' CCGCCAGGACAAACCAGTAT 3'                                                                                                                                       |
| RPL23A-1                                         | Fw: 5' TACGATGCTTTGGATGTTGC 3'<br>Rev: 5' AAAACAAAAGGGAGCCTCGT 3'                                                                                                                                           |
| RPL18A                                           | Fw: 5' AGCGGTGGTTTAAACAGAGG 3'<br>Rev: 5' GTGGTGGGGAAGCGAGATAG 3'                                                                                                                                           |
| RPL23A-2                                         | Fw: 5' CTGCCCTCCTAAAGCTGA 3'<br>Rev: 5' AGCGCTCTCCGAGGATATT 3'                                                                                                                                              |
| RPL3                                             | Fw: 5' AGCAAGGTTTTGACCGCTAA 3'<br>Rev: 5' TGCTGATTGTCACGTTCTGA 3'<br>Fw: 5'-CCAAGTCATCCGTGTCATTG-3'<br>Rev: 5'-CCTCCGTTACCTGGATCT-3'<br>Fw: 5'-ATGGAGATCCAGGTGAATGG-3'<br>Rev: 5'-GTTCACAGGAACCTGCTGCT-3'   |
| RPL10                                            | Fw: 5' AGCCAATTAAGCCGACTGAG 3'<br>Rev: 5' GGGGTAGTGCAAGGTCAGAA 3'                                                                                                                                           |
| RPL22                                            | Fw: 5'-GGAGCAAGAGCAAGATCAC-3'<br>Rev: 5'-GCGCAACCAGTCACGTAGAT-3'<br>Fw: 5'-TACGAGCTGCGTTACTTCCA-3'<br>Rev: 5'-CATTGCAGACCAATGTGTCC-3'                                                                       |
| RPL13a                                           | Fw: 5'-CATAGGAAGCTGGGAGCAAG-3'<br>Rev: 5'-GCCCTCCAATCAGTCTTCTG-3'<br>Fw: 5'-GGCTGAAGCCTACCAGAAAG-3'<br>Rev: 5'-CTTGGCCTTTTCTTCCGTT-3'                                                                       |
| RPS2                                             | Fw: 5' CCTGCGAAAAGATGTGTGTG 3'<br>Rev: 5' TCACCCGTGTGACTTTCGTA 3'<br>Fw: 5'-AAGATCAAGTCCCTGGAGGA-3'<br>Rev: 5'-AACCTCATCCTTGAGAGAGGC-3'<br>Fw: 5'-TGTTCTCCCTGCCATTAAG-3'<br>Rev: 5'-TCTGCACTGGCATGATTTTC-3' |
| <b>Sequences of ASOs</b>                         |                                                                                                                                                                                                             |
| αA1                                              | 5' mGmUmGmGmAGAGGACCGAGmCmCmUmUmA 3'                                                                                                                                                                        |
| αA2                                              | 5' mCmAmGmUmCCTGTTTCTCTmUmGmCmUmC 3'                                                                                                                                                                        |
| αA3                                              | 5' mUmGmUmUmG TACTGAAAACmCmGmUmGmG 3'                                                                                                                                                                       |
| αGFP                                             | 5' mUmCmAmCmCTTACCCTCTmCmCmAmCmU 3'                                                                                                                                                                         |

## SUPPLEMENTAL FIGURES

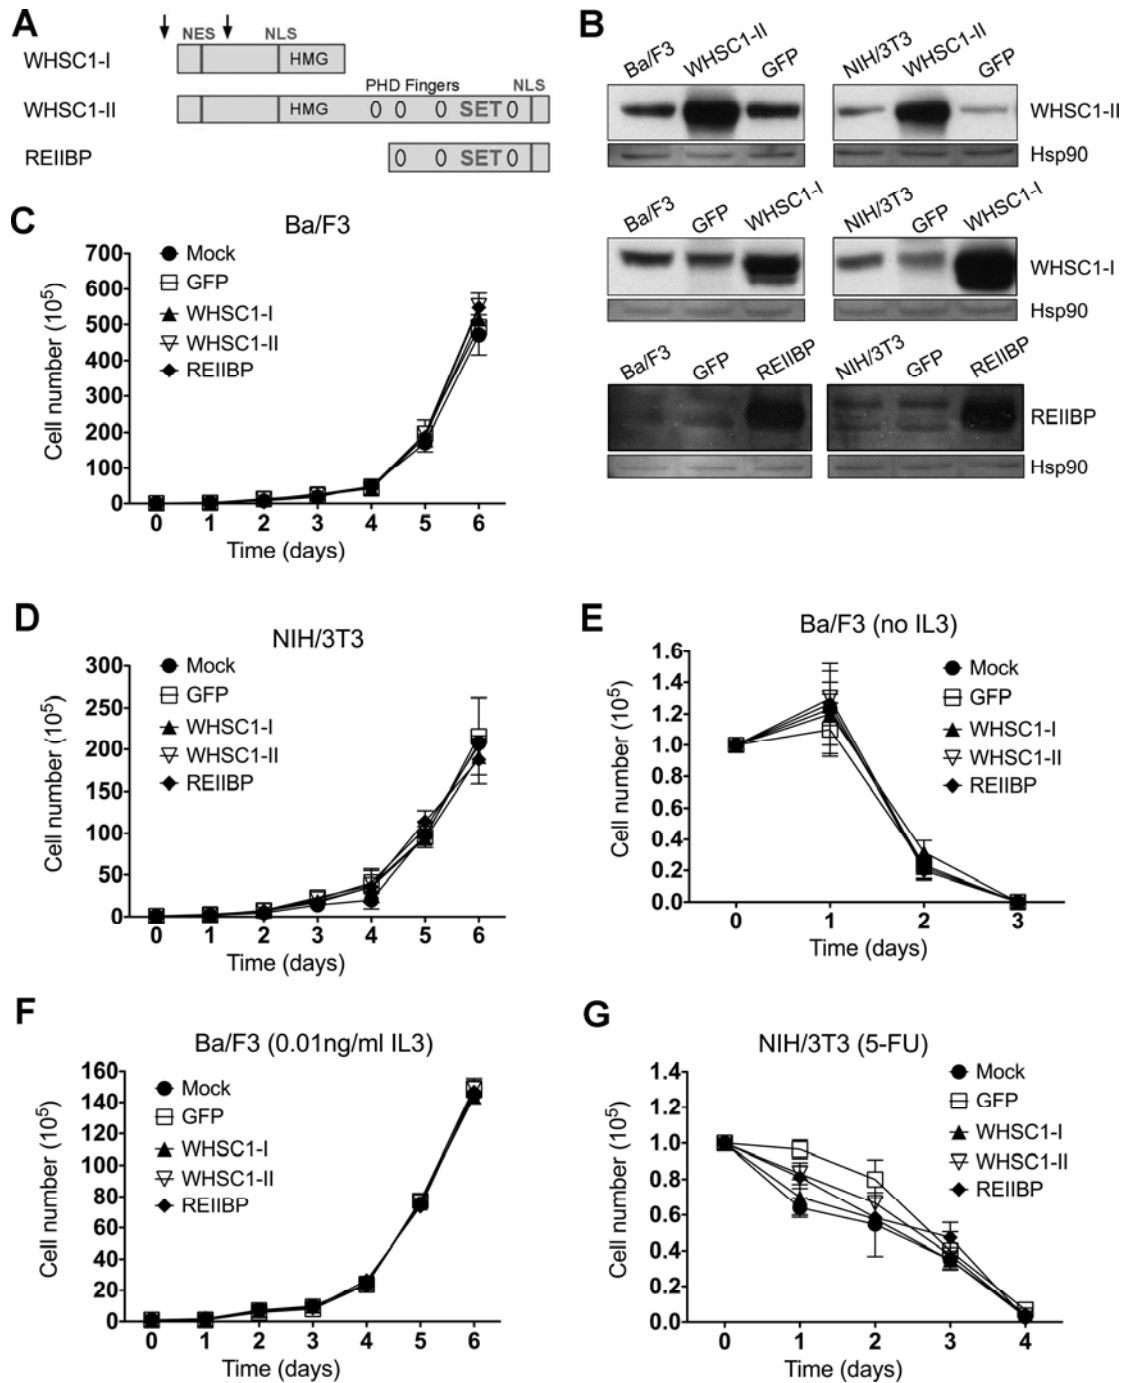

**Supplemental Figure 1: Over-expression of WHSC1 proteins was not sufficient to affect cell proliferation in cell culture. (A)** Cartoon of three isoforms of WHSC1. Exon 11 of WHSC1 contains poly-A/transcription stops that when included creates WHSC1-I and when skipped creates GFP WHSC1-II. REIIBP is the result of transcription from a downstream promoter.

NLS, nuclear localization signal; NES, nucleolar exclusion signal; HMG, high mobility group domain; SET, histone methyltransferase domain; PHD, plant home domain. Arrows indicate two breakpoint cluster regions found in t(4;14)-positive patients. **(B)** Over-expression of WHSC1 protein isoforms was confirmed by Western blot analysis. Hsp90, loading control. **(C)** WHSC1 isoforms did not affect the growth of murine hematopoietic Ba/F3 cells grown in the presence of IL-3. Equal numbers ( $1 \times 10^5$ ) of stably transfected Ba/F3 cells were plated in triplicate, and the viable cells were counted by trypan blue exclusion at the indicated time points for 6 days. **(D)** Growth of stably-transfected NIH/3T3 fibroblasts was not affected by WHSC1 proteins. Cell counts were performed as described in (C). **(E and F)** WHSC1 proteins did not significantly affect the growth of Ba/F3 cells cultured in medium with 0 ng/ml **(E)** or 0.01 ng/ml **(F)** IL-3. Cell counts were performed as described in (C). **(G)** WHSC1 isoforms did not protect cells from cytotoxic chemotherapy. NIH/3T3 cells were cultured with 50  $\mu$ g/ml 5-fluorouracil (5-FU), and cell counts were performed as described in (C). Data in **C-G** represent mean  $\pm$  SD, with n=3 per group.



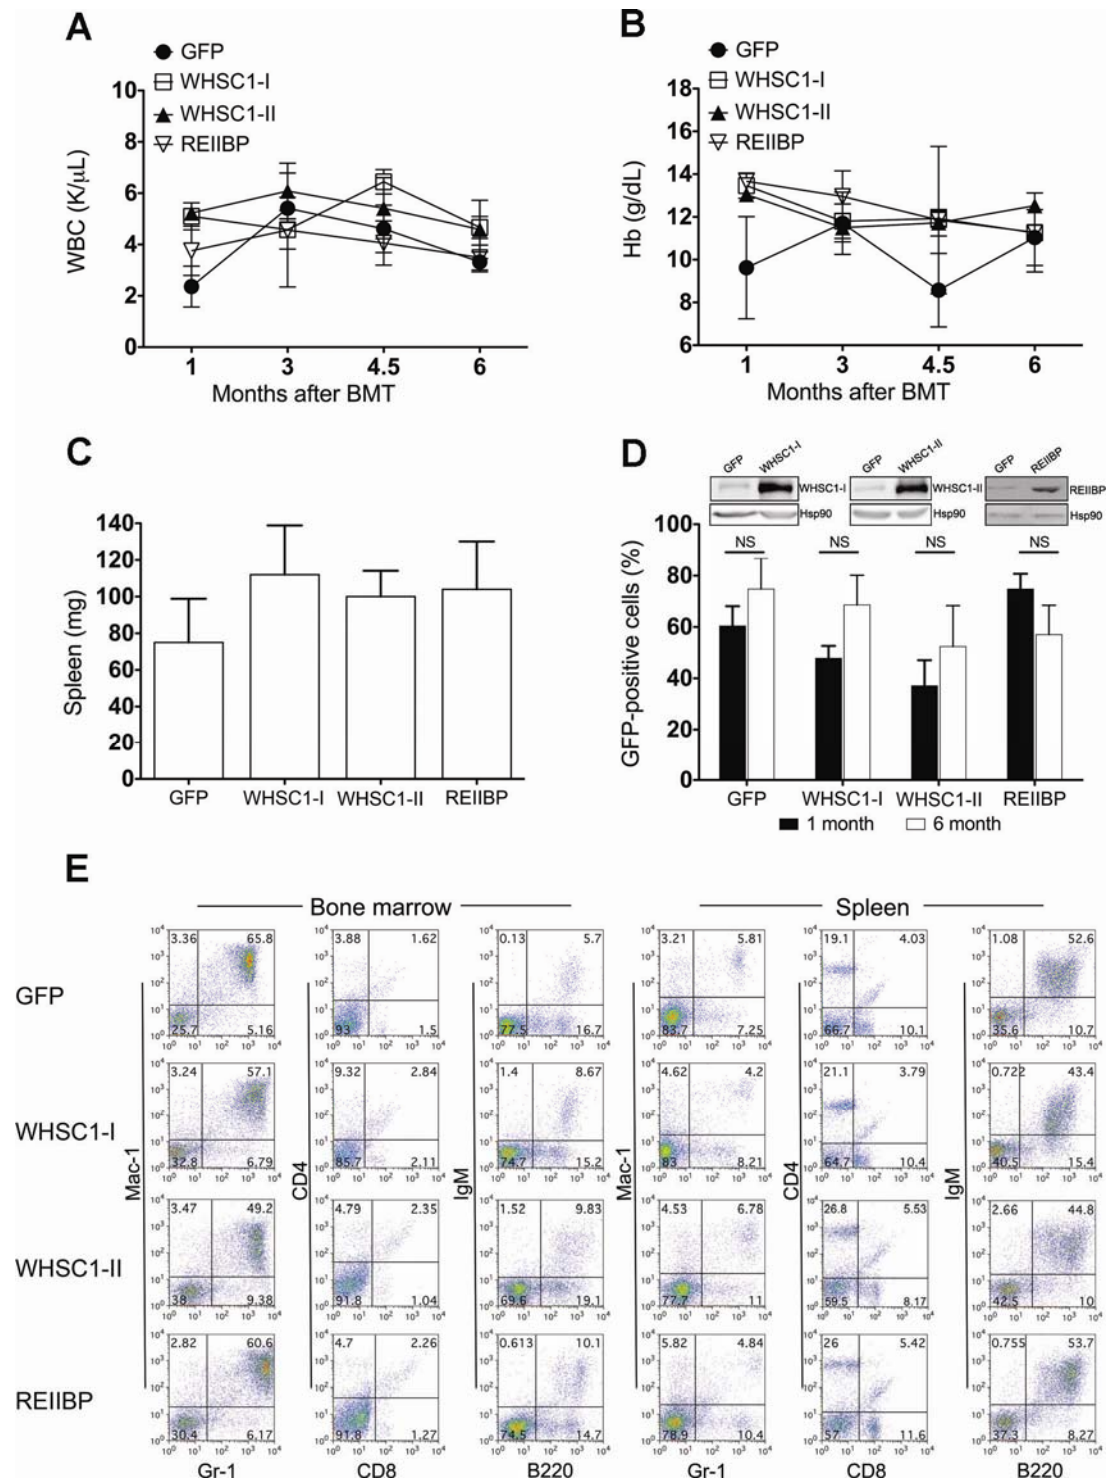

**Supplemental Figure 2: WHSC1 proteins did not induce disease in tumor-prone mice.**

High-titer ecotropic retroviruses encoding WHSC1-I, WHSC1-II, REIIBP or GFP only control were used in bone marrow transduction-transplantation assays (BMT). Tumor-prone *Cdkn2a*<sup>-/-</sup>

(null for both *Ink4a* and *Arf*) mice were used as bone marrow donors for all assays shown. Each group contained 5 independent transplantations. **(A)** White blood cell counts (WBC) from transplanted mice were not significantly affected by WHSC1 cDNA isoforms. **(B)** Peripheral blood hemoglobin (Hb) levels were not significantly affected by WHSC1 cDNA isoforms. **(C)** Spleen weights from WHSC1 transplanted mice sacrificed at 6 month time point showed no significant abnormality. A second set of mice transplanted with WHSC1 isoforms were followed for over one year with no consistent abnormalities found. One WHSC1-I transplanted mouse (out of 20) developed a GFP-negative leukemia. **(D)** WHSC1 cDNA isoforms did not provide significant competitive advantage to hematopoietic cells in mice. The fraction of GFP-positive peripheral blood mononuclear cells was measured at indicated time points. Over-expression of WHSC1 isoforms in the splenocytes was measured by Western blot analysis. Hsp90, loading control (inset). **(E)** Representative immunophenotype analysis of bone marrow and spleen mononuclear cells 6 months after WHSC1-isoform BMT. Cells were stained with fluorochrome-labeled antibodies as indicated. The transplanted mice demonstrated a near-normal complement of myeloid (Mac-1, Gr-1), T (CD4, CD8) and B (B220, IgM) cells. Data in **A-D** represent mean  $\pm$  SD with n=5 per group. NS, non significant.

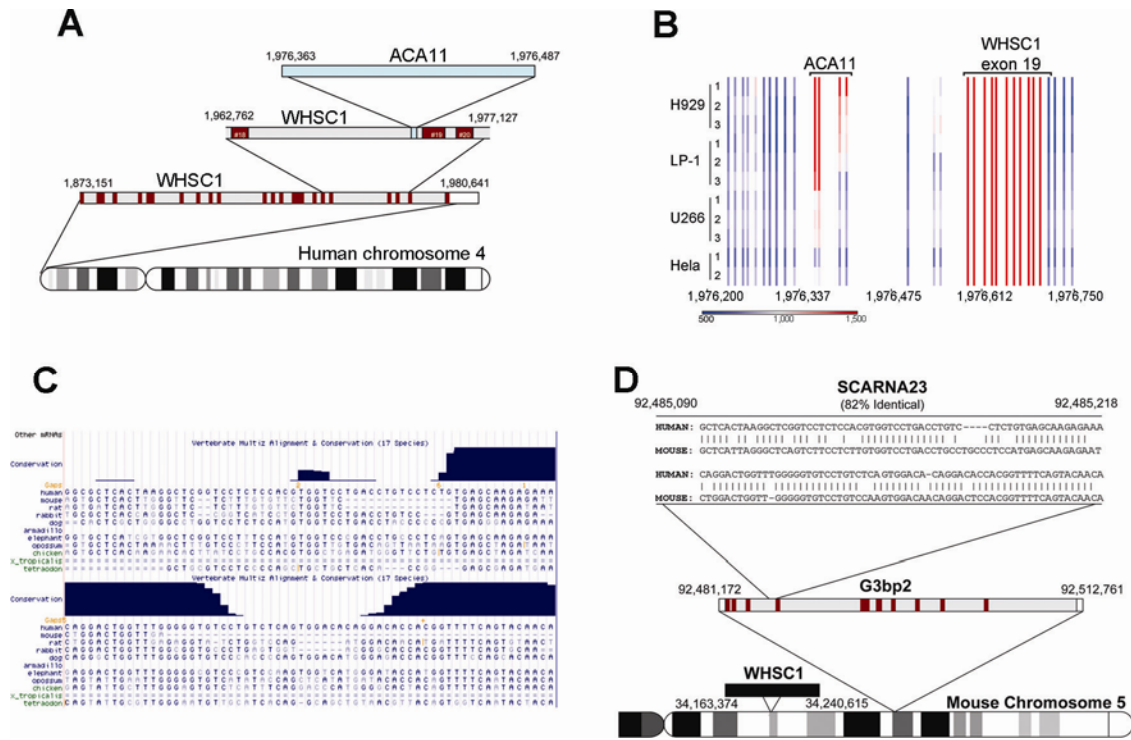

**Supplemental Figure 3: ACA11 is conserved across vertebrate species, but “jumped” prior mouse evolution. (A)** Schematic cartoon of ACA11’s physical location on chromosome 4 within the *WHSC1* gene. **(B)** Heat map of ACA11 locus expression in cell lines analyzed by tiling arrays. Total RNAs from indicated cell lines were assayed in triplicate. The HeLa cell line was tested in duplicate. **(C)** Cross-species comparison reveals only partial evolutionary conservation of the ACA11 locus. A “hole” was observed due to loss of part of the sequence in mice. **(D)** Schematic diagram of the location of the mouse version of ACA11 (*SCARNA23*) at a distant locus within the *G3bp2* gene on chromosome 5, based on BLAST sequence similarity.

## Ribonucleoprotein IP

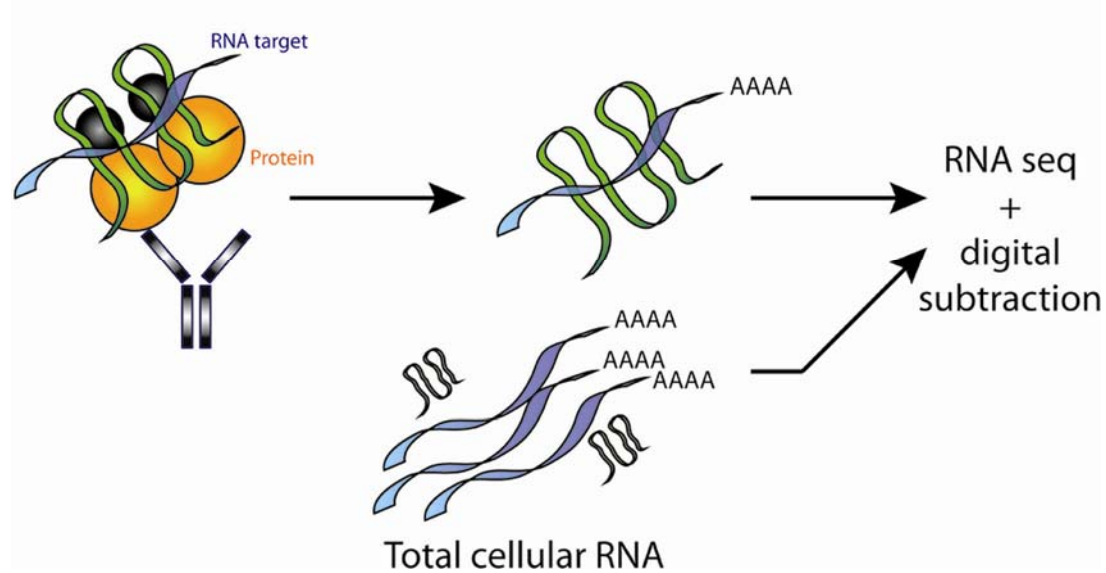

### Supplemental Figure 4: Schematic diagram of deep sequencing experimental design.

RNA was prepared from H929 myeloma cells using ILF3 immunoprecipitation to isolate ACA11 snRNP complex-associated RNAs. Total unfractionated RNA was isolated from H929 cells as a control. RNA libraries from each were subjected to deep sequencing and RNP-associated sequences were identified and mapped using MACS software.

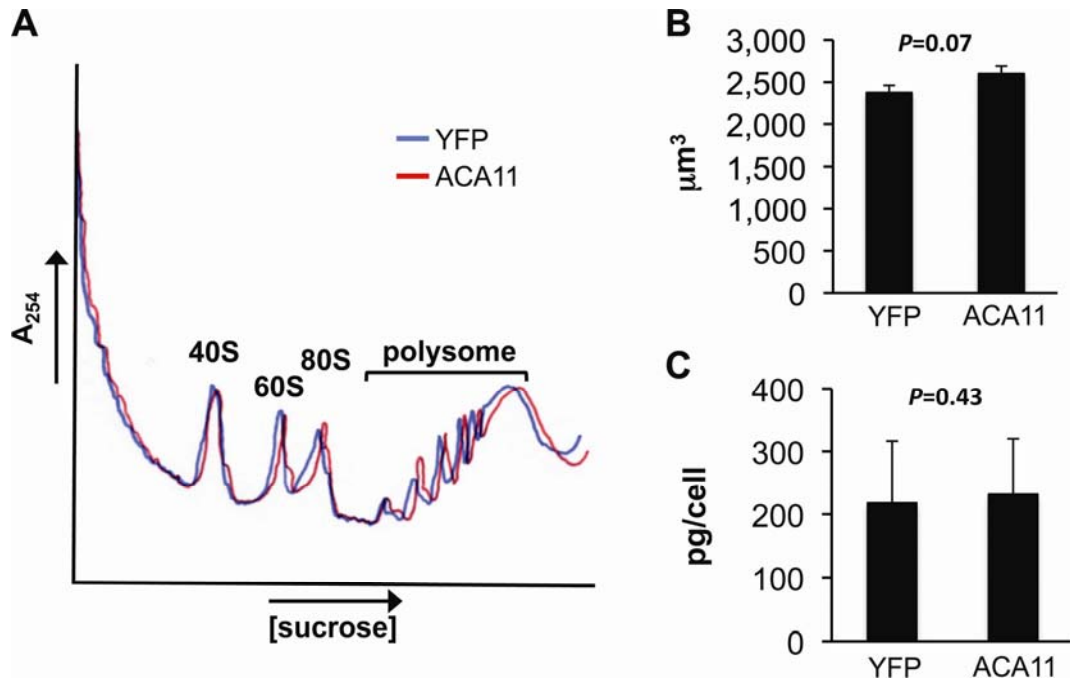

**Supplemental Figure 5: ACA11 did not significantly affect ribosome assembly or cell growth.** **(A)** Polyribosome profiles were characterized in cytosolic extracts of *Arf*<sup>-/-</sup> MEFs over-expressing ACA11 subjected to sucrose gradients. Subtle decreases in 40S ribosomal peaks were occasionally observed in cells over-expressing ACA11, but were not consistently detected. A representative curve of 4 independent experiments showing no significant differences is shown. **(B)** Cell size measurements of *Arf*<sup>-/-</sup> MEFs over-expressing ACA11. **(C)** Cell mass measurements of *Arf*<sup>-/-</sup> MEFs over-expressing ACA11. Data in **B**, **C** represent mean  $\pm$  SD, with n=3. P value is indicated.

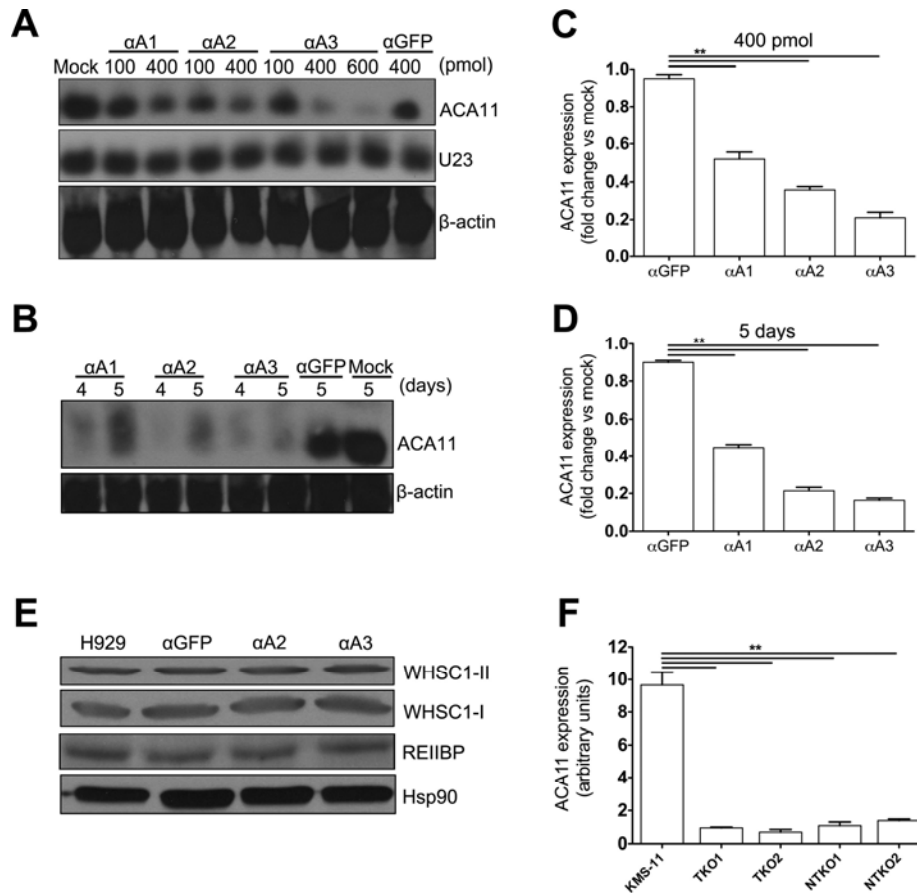

**Supplemental Figure 6: Antisense oligonucleotides (ASOs) efficiently knock-down ACA11 expression without affecting WHSC1 protein expression.** (A) Dose-response of ASOs knock-down of ACA11 in H929 cells at 2 days after nucleofection measured by Northern blot analysis. Expression of unrelated snoRNA U23 is shown as a control. αA1, αA2 and αA3, ASOs target ACA11. αGFP, ASO targets green fluorescent protein. (B) Northern blot analysis of ACA11 knock-down at late time-points (4 and 5 days) following nucleofection, using 600 pmol ASO in H929 cells. (C and D) qRT-PCR expression of ACA11 in ASO knock-down H929 cells using 400 pmol ASO at 2 days after nucleofection (C) or 600 pmol at 5 days after nucleofection (D). (E) Western blot analysis of WHSC1 proteins in ACA11 knock-down H929 cells using 600 pmol ASO. (F) ACA11 expression is severely reduced in WHSC1 knock-out KMS-11 cells (Courtesy of Ben Ho Park and Josh Lauring, Johns Hopkins University, see Lauring et al., Blood, 2008) measured by qRT-PCR. TKO, clone with knock out of the

translocated *WHSC1* allele. NTKO, clone with knock out of the nontranslocated *WHSC1* allele. qRT-PCR data in **(C,D,F)** were normalized to the average of 3 reference genes (GAPDH, UBC, YWHAZ). Data are presented as mean  $\pm$  SD. n=3. \*\*p<0.01.

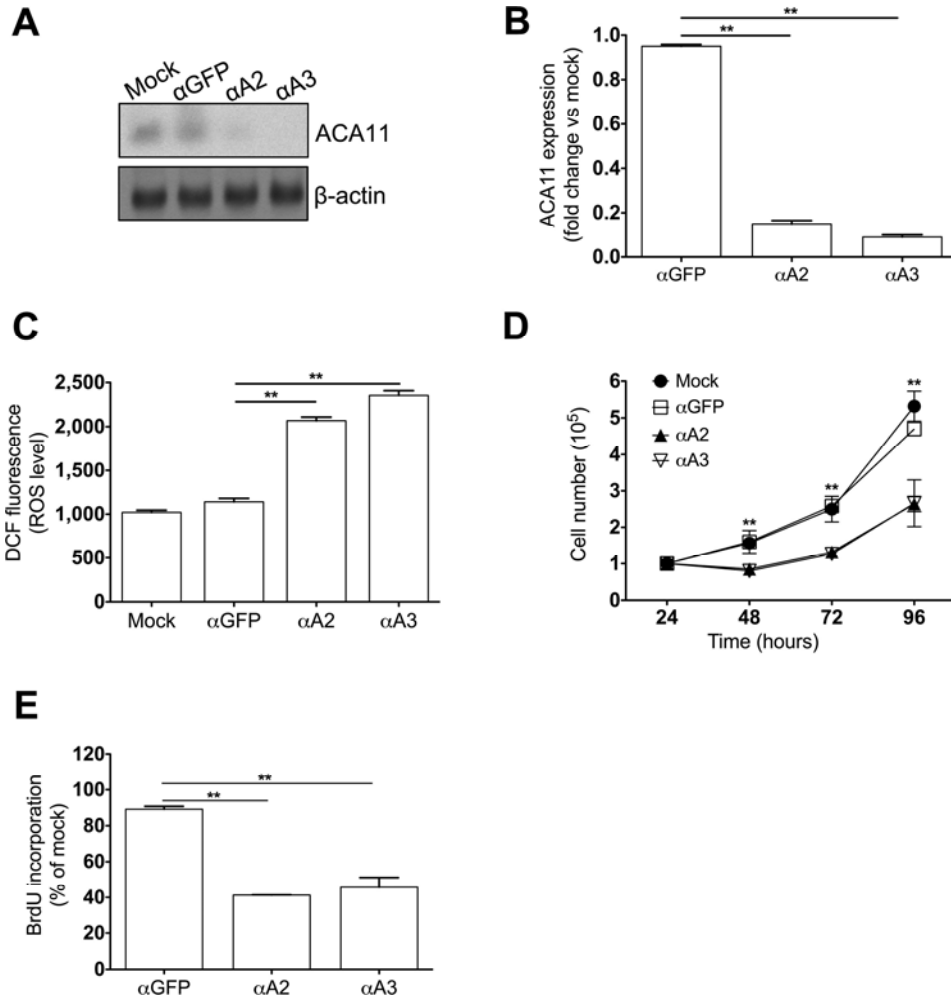

**Supplemental Figure 7: Knock-down of ACA11 expression in t(4;14)-negative RPMI8226 MM cells affects oxidative stress and cell proliferation. (A)** Northern blot analysis showing knock-down of ACA11 in RPMI8226 cells 96hr after nucleofection.  $\alpha$ A2 and  $\alpha$ A3, ASOs target ACA11.  $\alpha$ GFP, ASO targets green fluorescent protein. **(B)** Quantification of ACA11 knock-down in RPMI8226 cells by qRT-PCR. **(C)** ROS levels measured by DCF fluorescence in ACA11 knock-down cells 48hr after nucleofection. **(D)** Reduction of cell proliferation in ACA11 knock-down cells measured by cell counting. **(E)** Reduction of BrdU incorporation in ACA11 knock-down cells measured by cell counting. 600 pmol ASOs/ $10^6$  cells were used in **(A-E)**. Data in **(B-E)** represent mean  $\pm$  SD, with n=3, \*\*p<0.01.



## SUPPLEMENTAL METHODS

**Cell culture and transfection.** NIH/3T3, 293T, A375, HeLa, U1A and MEF cells were grown in Dulbecco's modified Eagle's medium (Lonza) containing 10% fetal bovine serum (FBS, Thermo), 1× penicillin-streptomycin (Pen/Strep) and 1% non-essential amino acid (Cellgro, MEF only). KMS-11, TKO, NTKO (gift of Ben Ho Park, Johns Hopkins University, Baltimore, MD), OPM-2, LP-1, RPMI8226, MM.1S, K562 and Ba/F3 cells were grown in Roswell Park Memorial Institute medium 1640 (RPMI 1640, Lonza) containing 10% FBS, 1× Pen/Strep and 1 ng/ml recombinant mouse interleukin-3 (R&D, Ba/F3 only). U266 and H929 cells were grown in RPMI 1640 (ATCC) containing 10% FBS, 1× Pen/Strep and 0.05 mM 2-mercaptoethanol (Sigma, H929 only). Primary murine bone marrow mononuclear cells were grown in transplant medium consisting of RPMI 1640 (Lonza), 20% FBS, 1× Pen/Strep, 10 ng/ml stem cell factor (SCF, R&D), 6 ng/ml IL-3, 50 ng/ml Flt-3 (R&D), and 10 ng/ml thrombopoietin (PeproTech). Cells were maintained at 37°C in a 5% CO<sub>2</sub> humidified incubator. Cells were transfected using polyfect transfection reagent (QIAGEN) according to the manufacturer's protocol. We used MEFs null for the ribosome biogenesis regulator Arf (Arf<sup>-/-</sup>).

**Plasmid constructs.** Amplification of the coding region of human ACA11 or U23 was performed according to the protocol of REDEExtract-N-Amp tissue PCR kit (Sigma). Primer sequences are listed in **Supplemental Table 6**. The amplified DNA was subcloned to HindIII/XbaI-linearized pBluescript II KS (+) vector (Stratagene) (pBS-ACA11). Lentiviral vector FCY-si was provided by Jeff Milbrandt (Washington University in St. Louis). It contains a U6 promoter upstream from the cloning site and expresses the yellow fluorescent protein (YFP). The 125bp ACA11 oligonucleotides were annealed and ligated into AgeI/BamHI-linearized FCY-si vector. The expression vector pEGFP-C1-NPM1 was provided by Jason Weber (Washington University in St. Louis). The cDNAs encoding human WHSC1-I, WHSC1-II or REIIBP (provided by Pierre-Olivier Angrand, Cellzome AG, Heidelberg, Germany) were

subcloned to the retroviral vector MSCV-IRES-GFP (provided by Warren Pear, University of Pennsylvania). The identity of all constructs was verified by sequencing analysis.

**Virus production.** Recombinant lentivirus or retrovirus was generated by transient cotransfection of 293T cells with lentiviral or retroviral transducing vector, and packaging vectors pMD.G and pCMVdeltaR8.91 (for lentivirus) or pMD.G and pMD-gagpol (for amphotropic retrovirus) or Ecopac (for ecotropic retrovirus). Viral supernatant was harvested 48 hours after transfection, and the titer of the infectious virus was determined by measuring percentage of YFP- or GFP-positive cells using NIH/3T3 cells infected with serial dilutions of virus in the presence of 10 µg/ml of polybrene (American Bioanalytical). The stable transduced cells were obtained by sorting based on equivalent GFP or YFP expression levels.

**Murine bone marrow transduction-transplantation (mBMT) and mice phenotype analysis.** Mice (Jackson) were maintained in the animal facility at Washington University in St. Louis according to proper institutional guidelines. Retroviral transduction and transplantation of bone marrow cells were performed as described (1). *Cdkn2a*<sup>-/-</sup> (exon 2 knockouts null for both Ink4a and Arf proteins) mice were used as bone marrow donors. Peripheral blood was obtained by retroorbital phlebotomy and blood counts were analyzed (Hemavet, CDC technologies). Spleen and liver weight were recorded when mice were sacrificed.

**Flow cytometry.** Flow cytometry was performed as described (2). Antibodies used in the current analysis were anti-CD4, anti-CD8, anti-Mac-1, anti-Gr-1, anti-IgM and anti-B220 (BD). Acquisition was performed on the CellQuest software (BD) and data analysis was performed on the FLOWJO software (Tree Star).

**Cell fractionation.** Cells were swollen in a hypotonic buffer (10 mM HEPES-KOH pH 7.9, 1.5 mM MgCl<sub>2</sub>, 10 mM KCl, 0.5 mM DTT) for 30 min and homogenized with a Kontes Dounce homogenizer. The dounced cells were centrifuged at 1200rpm for 5 min, and the supernatant was retained as the cytoplasmic fraction. The nuclear pellet was resuspended in 450 µl of 0.25 M sucrose/10 mM MgCl<sub>2</sub> and layered over equal volume of 0.35 M sucrose/0.5 mM MgCl<sub>2</sub>, then centrifuged at 3000rpm for 5 min. The clean, pelleted nuclei were resuspended in 750 µl of 0.35 M sucrose/0.5 mM MgCl<sub>2</sub> and sonicated for 8X10 sec (with 30 sec rest between each sonication) with a sonic dismembrator (Thermo) until all the nuclei were disrupted. The sonicated samples were layered over equal volume of 0.88 M sucrose/0.5 mM MgCl<sub>2</sub> and centrifuged at 2800g for 10 min in a horizontal rotor. The upper layers, constituting the nucleoplasmic fraction, were carefully removed. The nucleolar pellets were washed by resuspending in 500 µl of 0.35 M sucrose/0.5 mM MgCl<sub>2</sub> and centrifuged at 2800g for 10 min. All steps were carried out at 4°C. Each preparation was controlled under the phase-contrast microscope.

**RNA electrophoretic mobility shift assay.** The plasmid pBS-ACA11 was linearized with XbaI and incubated with T3 RNA polymerase. The 3' end biotinylated ACA11 RNA was generated using T4 RNA ligase (Pierce). 5 ng of RNA was incubated with 0.5 µg of native nuclear protein extracts (prepared using NE-PER nuclear and cytoplasmic extraction reagents, Pierce), and the EMSA binding buffer (10 mM HEPES pH7.3, 20 mM KCl, 1 mM MgCl<sub>2</sub>, 1 mM DTT), 5% glycerol, 10 µg tRNA for 25 min at room temperature. Complexes were resolved by 6% nondenaturing polyacrylamide gel (0.5 x Tris borate-EDTA, pH8.3) for 3 hr at 10V/cm and transferred to a nylon membrane (Thermo) at 400 mA for 30 min and fixed by UV cross-linking. Blocking and detection of biotin-labeled bands was performed using the LightShift Chemiluminescent RNA EMSA kit (Thermo) according to the manufacturer's instructions. Experiments were repeated 3 times.

**RNA affinity chromatography.** 10 µg of biotinylated ACA11 RNA was incubated with 150 µg of native nuclear extracts in the EMSA binding buffer for 25 min at room temperature. The mixture was further incubated with 100 µl of high capacity streptavidin agarose resin (Pierce) for 2 hr at 4°C with rotation. Reaction without the addition of biotinylated RNA served as negative control. The resins were centrifuged for 2 min at 3000g and washed six times with the binding buffer. The resins were boiled for 5 min in loading buffer to release captured proteins, which were resolved on an 8% SDS-PAGE gel. The proteins were commassie-stained with the GelCode blue stain reagent (Pierce) and those prominently captured bands were excised for mass spectrometry analysis.

**RNA sequencing.** The whole transcriptome libraries were generated according to Illumina protocol. Briefly, the RNA fragments were ligated to RNA 3' adapter and 5' adapter using T4 RNA ligase. The equivalent of adapter-ligated RNAs were then incubated with the SRA RT primer at 65°C for 10 min. Reverse transcription was performed by incubating the mixture for 1 hr at 44°C with the SuperScript III reverse transcriptase (Invitrogen). The reverse transcribed cDNAs were amplified by a 12 cycles of PCR with small RNA PCR primer 1.0 and small RNA PCR primer 2.0, ensured on a PAGE gel, and purified by using the Agencourt AMPure XP beads (Beckman Coulter). The libraries were validated by using the Agilent Technologies 2100 bioanalyzer and submitted for sequencing on the Illumina HiSeq 2000 platform. The MACS (Model-based Analysis for CHIP-Seq) algorithm was used to discover regions enhanced in the pull-down sample compared to the total input control RNA sample. The peaks called by MACS were sorted by number of tags to give the top fifty enhanced RNAs. Data were imported into and visualized in UCSC Genome Browser. Experiments were repeated 2 times.

**SnoRNA knock-down.** The antisense oligonucleotides (ASOs) were designed as complementary sequences to ACA11. ASOs were 20-nucleotides (nt) long and comprised 10 deoxyribonucleotides flanked by 5nt 2'-O-methoxyethyl (2'-O-MOE) modified ribonucleotides at both sides. All ASOs were covered by phosphorothioate (IDT). Cells were resuspended in 100 µl of solution V (Cell Line Nucleofector Kit V, Amaxa) and mixed with the ASOs. Transfection was carried out using program T-001 (H929), G015 (RPMI8226) or O-10 (KMS-11) on the Amaxa nucleofector instrument. Cells were subsequently cultured in complete growth medium for further analysis. The sequences of ASOs are listed in **Supplemental Table 6.**

**Ribosome fractionation.** Ribosome profiles were performed as described previously (25). Briefly, cells were treated with 10 µg/ml cycloheximide prior to harvesting and counting. Cytosolic extracts from equal numbers of cells ( $3 \times 10^6$ ) were separated over sucrose gradients. The gradients were fractionated with an ISCO Teledyne Gradient Fractionator with constant absorbance monitored at 254nm. Experiments were repeated 4 times.

**Xenograft mouse model.** 6-week-old male triple immune-deficient BNX mice were obtained from NCI-Frederick and maintained in an accredited animal facility according to proper institutional guidelines. Cells were nucleofected with ACA11 ASOs, incubated at 37°C for 48 hr, washed twice and mixed with same volume of matrigel basement membrane matrix (BD).  $8.5 \times 10^6$  mock or knock-down cells were subcutaneously injected into the right flank of each mouse. Tumors were constantly monitored and the tumors' volume was calculated using the formula:  $4/3 \times (\text{width}/2)^2 \times (\text{length}/2)$ .

**Antibodies.** Antibodies to WHSC1-I, WHSC1-II, Hsp90, NCL, Lamin B, RPL22, RPL3, RPS2, γ-tubulin, IgG (Santa Cruz), Drosha, DHX9, ADAR, ILF3, PARP1 (Abcam), DNA-PK, RPL13a

(Cell Signaling), SF3B1, hnRNP U (Novus), DDX21, DDX5 (Bethyl), SOD (Cal Biochem), NUP62 (Covance), NPM1 (Invitrogen) and REIIBP (made by our lab) were used as primary antibodies for western blot or immunoprecipitation. Blots were incubated with horseradish peroxidase-conjugated secondary antibodies (Amersham Biosciences) and visualized by enhanced chemiluminescence (Pierce Biotechnology). Images were analyzed using Image Lab 3.0 software (Bio-Rad). Experiments were repeated 3 times.

## SUPPLEMENTAL REFERENCES

1. Tomasson MH, et al. Fatal myeloproliferation, induced in mice by TEL/PDGFBetaR expression, depends on PDGFBetaR tyrosines 579/581. *J Clin Invest.* 2000; 105 (4): 423-432.
2. Cain JA, et al. Myeloproliferative disease induced by TEL-PDGFRB displays dynamic range sensitivity to Stat5 gene dosage. *Blood.* 2007; 109 (9): 3906-3914.
